# Supplementary material
Source: MDPI journal article supplement (https://www.mdpi.com/search?q=molbank-2023-M1565)
Supplement: s002 [file molbank-2023-M1565-s002.inchi]

InChI=1S/C3H4N4/c1-2-3-4-6-7-5-3/h2H,1H2,(H,4,5,6,7)
AuxInfo=1/1/N:1,2,3,4,7,5,6/E:(4,5)(6,7)/rA:7CCCNNNN/rB:d1;s2;d3;s4;d5;s3s6;/rC:60.9448,-8.3204,0;62.4847,-8.342,0;63.5582,-9.4461,0;63.1389,-10.9279,0;64.4186,-11.7846,0;65.629,-10.8323,0;65.0972,-9.3869,0;
