# Supplementary material
Source: MDPI journal article supplement (https://www.mdpi.com/search?q=molbank-2023-M1565)
Supplement: s003 [file molbank-2023-M1565-s003.cif]

data_5-vt
_audit_creation_date               2022-12-12
_audit_creation_method
;
Olex2 1.5
(compiled 2022.04.07 svn.rca3783a0 for OlexSys, GUI svn.r6498)
;
_shelx_SHELXL_version_number       '2018/3'
_audit_contact_author_address      ?
_audit_contact_author_email        spb.xrd@gmail.com
_audit_contact_author_name         'Aleksandra'
_audit_contact_author_phone        ?
_publ_contact_author_id_orcid      0000-0003-4583-196X
_publ_section_references
;
Dolomanov, O.V., Bourhis, L.J., Gildea, R.J, Howard, J.A.K. & Puschmann, H.
 (2009), J. Appl. Cryst. 42, 339-341.

Sheldrick, G.M. (2015). Acta Cryst. C71, 3-8.
;
_chemical_name_common              ?
_chemical_name_systematic          ?
_chemical_formula_moiety           'C3 H4 N4'
_chemical_formula_sum              'C3 H4 N4'
_chemical_formula_weight           96.10
_chemical_melting_point            ?
_chemical_oxdiff_formula           'C3 N4 H4'
loop_
  _atom_type_symbol
  _atom_type_description
  _atom_type_scat_dispersion_real
  _atom_type_scat_dispersion_imag
  _atom_type_scat_source
 'C' 'C' 0.0181 0.0091 'International Tables Vol C Tables 4.2.6.8 and 6.1.1.4'
 'H' 'H' 0.0000 0.0000 'International Tables Vol C Tables 4.2.6.8 and 6.1.1.4'
 'N' 'N' 0.0311 0.0180 'International Tables Vol C Tables 4.2.6.8 and 6.1.1.4'

_shelx_space_group_comment
;
The symmetry employed for this shelxl refinement is uniquely defined
by the following loop, which should always be used as a source of
symmetry information in preference to the above space-group names.
They are only intended as comments.
;
_space_group_crystal_system        'monoclinic'
_space_group_IT_number             14
_space_group_name_H-M_alt          'P 1 21/c 1'
_space_group_name_Hall             '-P 2ybc'
loop_
  _space_group_symop_operation_xyz
 'x, y, z'
 '-x, y+1/2, -z+1/2'
 '-x, -y, -z'
 'x, -y-1/2, z-1/2'

_cell_length_a                     7.7861(3)
_cell_length_b                     9.6722(3)
_cell_length_c                     6.7435(3)
_cell_angle_alpha                  90
_cell_angle_beta                   115.263(5)
_cell_angle_gamma                  90
_cell_volume                       459.27(4)
_cell_formula_units_Z              4
_cell_measurement_reflns_used      2342
_cell_measurement_temperature      100(2)
_cell_measurement_theta_max        68.6220
_cell_measurement_theta_min        6.2800
_shelx_estimated_absorpt_T_max     0.975
_shelx_estimated_absorpt_T_min     0.921
_exptl_absorpt_coefficient_mu      0.840
_exptl_absorpt_correction_T_max    1.00000
_exptl_absorpt_correction_T_min    0.90864
_exptl_absorpt_correction_type     multi-scan
_exptl_absorpt_process_details
;
CrysAlisPro 1.171.41.115a (Rigaku Oxford Diffraction, 2021)
Empirical absorption correction using spherical harmonics,
implemented in SCALE3 ABSPACK scaling algorithm.
;
_exptl_absorpt_special_details     ?
_exptl_crystal_colour              colourless
_exptl_crystal_colour_lustre       .
_exptl_crystal_colour_modifier     .
_exptl_crystal_colour_primary      colourless
_exptl_crystal_density_diffrn      1.390
_exptl_crystal_density_meas        ?
_exptl_crystal_density_method      ?
_exptl_crystal_description         prism
_exptl_crystal_F_000               200
_exptl_crystal_size_max            0.1
_exptl_crystal_size_mid            0.06
_exptl_crystal_size_min            0.03
_exptl_transmission_factor_max     ?
_exptl_transmission_factor_min     ?
_diffrn_reflns_av_R_equivalents    0.0268
_diffrn_reflns_av_unetI/netI       0.0223
_diffrn_reflns_Laue_measured_fraction_full  0.998
_diffrn_reflns_Laue_measured_fraction_max  0.995
_diffrn_reflns_limit_h_max         9
_diffrn_reflns_limit_h_min         -9
_diffrn_reflns_limit_k_max         11
_diffrn_reflns_limit_k_min         -11
_diffrn_reflns_limit_l_max         7
_diffrn_reflns_limit_l_min         -8
_diffrn_reflns_number              3211
_diffrn_reflns_point_group_measured_fraction_full  0.998
_diffrn_reflns_point_group_measured_fraction_max  0.995
_diffrn_reflns_theta_full          67.684
_diffrn_reflns_theta_max           69.088
_diffrn_reflns_theta_min           6.286
_diffrn_ambient_environment        N~2~
_diffrn_ambient_temperature        100(2)
_diffrn_detector                   'Hybrid Pixel Array Detector'
_diffrn_detector_area_resol_mean   10.0000
_diffrn_detector_type              HyPix3000
_diffrn_measured_fraction_theta_full  0.998
_diffrn_measured_fraction_theta_max  0.995
_diffrn_measurement_details
;
List of Runs (angles in degrees, time in seconds):

  # Type    Start    End  Width  t~exp~   \w     \q     \k     \f   Frames
--------------------------------------------------------------------------
  1  \w    -73.00 -48.00   0.50    0.40    --  -35.49 125.00 166.00   50
  2  \w    -62.00 -17.00   0.50    0.40    --  -35.49 -40.00 148.00   90
  3  \w    -23.00  23.00   0.50    0.40    --  -35.49  81.00  96.00   92
  4  \w    -55.00 -30.00   0.50    0.40    --  -35.49  81.00  96.00   50
  5  \w     46.00 101.00   0.50    0.40    --   35.49  40.00 -58.00  110
  6  \w     48.00  73.00   0.50    0.40    --   35.49-146.00 -77.00   50
  7  \w     16.00  41.00   0.50    0.40    --   35.49  40.00 -58.00   50
  8  \w     11.00  37.00   0.50    0.40    --   35.49 -40.00 148.00   52
  9  \w      1.00  49.00   0.50    0.40    --   35.49 -81.00 -26.00   96
 10  \w     94.00 120.00   0.50    0.70    --  100.00 146.00 -26.00   52
 11  \w     30.00  68.00   0.50    0.70    --  100.00 -40.00 148.00   76
 12  \w    121.00 154.00   0.50    0.70    --  100.00  81.00  96.00   66
 13  \w     40.00  72.00   0.50    0.70    --  100.00 -81.00 -26.00   64
 14  \w     91.00 118.00   0.50    0.70    --  100.00 125.00 166.00   54
 15  \w     86.00 118.00   0.50    0.70    --  100.00  40.00 -58.00   64
 16  \w    -60.00 -35.00   0.50    0.40    --  -35.49 146.00 -26.00   50
 17  \w      8.00  65.00   0.50    0.40    --   35.49-104.00-180.00  114
 18  \w     31.00  57.00   0.50    0.40    --   35.49-138.00  90.00   52
 19  \w     81.00 155.00   0.50    0.70    --  100.00  37.00   0.00  148
 20  \w     67.00 103.00   0.50    0.70    --  100.00 -91.00 -60.00   72
 21  \w     84.00 156.00   0.50    0.70    --  100.00  77.00  30.00  144
 22  \w     73.00 138.00   0.50    0.70    --  100.00  22.00 -60.00  130
 23  \w     28.00  92.00   0.50    0.70    --  100.00-107.00 150.00  128
 24  \w     60.00 103.00   0.50    0.70    --  100.00-125.00  88.00   86
 25  \w     86.00 112.00   0.50    0.70    --  100.00-125.00  88.00   52
 26  \w    -87.00 -24.00   0.50    0.40    --  -35.49  11.00  90.00  126
 27  \w    -51.00  12.00   0.50    0.40    --  -35.49 104.00 -90.00  126
 28  \w     10.00  40.00   0.50    0.40    --  -35.49  11.00  90.00   60
 29  \w     33.00  68.00   0.50    0.40    --   35.49 -89.00 -60.00   70
 30  \w     24.00  50.00   0.50    0.40    --   35.49  21.00  60.00   52
 31  \w     76.00 110.00   0.50    0.40    --   35.49  21.00  60.00   68
 32  \w    -11.00  37.00   0.50    0.40    --   35.49-104.00  90.00   96
 33  \w     43.00  69.00   0.50    0.40    --   35.49-104.00  90.00   52
 34  \w    -28.00   3.00   0.50    0.40    --   35.49 -89.00 -60.00   62
 35  \w     41.00  85.00   0.50    0.70    --  100.00 -69.00-150.00   88
 36  \w     80.00 119.00   0.50    0.70    --  100.00  45.00-150.00   78
 37  \w     83.00 110.00   0.50    0.70    --  100.00  77.00 150.00   54
 38  \w    132.00 157.00   0.50    0.70    --  100.00  45.00-150.00   50
 39  \w     30.00  78.00   0.50    0.70    --  100.00 -30.00  90.00   96
 40  \w    132.00 157.00   0.50    0.70    --  100.00  37.00  90.00   50
 41  \w     28.00  53.00   0.50    0.70    --  100.00 -91.00-180.00   50
 42  \w     83.00 112.00   0.50    0.70    --  100.00  37.00 150.00   58
 43  \w     53.00  97.00   0.50    0.70    --  100.00-107.00 120.00   88
 44  \w     82.00 107.00   0.50    0.70    --  100.00-107.00  30.00   50
 45  \w     94.00 119.00   0.50    0.70    --  100.00  37.00  90.00   50
 46  \w     28.00  66.00   0.50    0.70    --  100.00-107.00  30.00   76
 47  \w    122.00 155.00   0.50    0.70    --  100.00  37.00 150.00   66
 48  \w     57.00 105.00   0.50    0.70    --  100.00-107.00-120.00   96
 49  \w     33.00  97.00   0.50    0.70    --  100.00 -69.00  30.00  128
 50  \w     71.00  99.00   0.50    0.70    --  100.00-107.00-180.00   56
 51  \w    115.00 154.00   0.50    0.70    --  100.00 107.00-150.00   78
 52  \w     33.00 123.00   0.50    0.70    --  100.00 -61.00 120.00  180
 53  \w     45.00  71.00   0.50    0.70    --  100.00-107.00 -60.00   52
 54  \w     78.00 107.00   0.50    0.70    --  100.00-107.00 -60.00   58
 55  \w     85.00 110.00   0.50    0.70    --  100.00 107.00 -90.00   50
 56  \w    113.00 154.00   0.50    0.70    --  100.00 107.00 150.00   82
 57  \w     89.00 126.00   0.50    0.70    --  100.00 -69.00-150.00   74
 58  \w     48.00 117.00   0.50    0.70    --  100.00 -37.00   0.00  138
 59  \w    122.00 153.00   0.50    0.70    --  100.00 107.00  60.00   62
 60  \w    106.00 132.00   0.50    0.70    --  100.00 107.00  30.00   52
 61  \w     71.00  97.00   0.50    0.70    --  100.00-125.00-120.00   52
 62  \w     54.00  80.00   0.50    0.70    --  100.00 -37.00 -30.00   52
 63  \w     83.00 109.00   0.50    0.70    --  100.00 107.00  60.00   52
;
_diffrn_measurement_device         'four-circle diffractometer'
_diffrn_measurement_device_type   
 'SuperNova, Single source at offset/far, HyPix3000'
_diffrn_measurement_method         '\w scans'
_diffrn_orient_matrix_type        
 'CrysAlisPro convention (1999,Acta A55,543-557)'
_diffrn_orient_matrix_UB_11        0.1337422000
_diffrn_orient_matrix_UB_12        -0.1122420000
_diffrn_orient_matrix_UB_13        -0.0167601000
_diffrn_orient_matrix_UB_21        -0.1722596000
_diffrn_orient_matrix_UB_22        -0.0789676000
_diffrn_orient_matrix_UB_23        -0.1686918000
_diffrn_orient_matrix_UB_31        0.0173380000
_diffrn_orient_matrix_UB_32        0.0808932000
_diffrn_orient_matrix_UB_33        -0.1872168000
_diffrn_radiation_monochromator    mirror
_diffrn_radiation_probe            x-ray
_diffrn_radiation_type             'Cu K\a'
_diffrn_radiation_wavelength       1.54184
_diffrn_source                     'micro-focus sealed X-ray tube'
_diffrn_source_type                'SuperNova (Cu) X-ray Source'
_diffrn_special_details            ?
_reflns_Friedel_coverage           0.000
_reflns_Friedel_fraction_full      .
_reflns_Friedel_fraction_max       .
_reflns_number_gt                  797
_reflns_number_total               846
_reflns_special_details
;
 Reflections were merged by SHELXL according to the crystal
 class for the calculation of statistics and refinement.
 
 _reflns_Friedel_fraction is defined as the number of unique
 Friedel pairs measured divided by the number that would be
 possible theoretically, ignoring centric projections and
 systematic absences.
;
_reflns_threshold_expression       'I > 2\s(I)'
_computing_cell_refinement         'CrysAlisPro 1.171.41.115a (Rigaku OD, 2021)'
_computing_data_collection         'CrysAlisPro 1.171.41.115a (Rigaku OD, 2021)'
_computing_data_reduction          'CrysAlisPro 1.171.41.115a (Rigaku OD, 2021)'
_computing_molecular_graphics      'Olex2 1.5 (Dolomanov et al., 2009)'
_computing_publication_material    'Olex2 1.5 (Dolomanov et al., 2009)'
_computing_structure_refinement    'SHELXL 2018/3 (Sheldrick, 2015)'
_computing_structure_solution      'SHELXT 2018/2 (Sheldrick, 2018)'
_refine_diff_density_max           0.228
_refine_diff_density_min           -0.143
_refine_diff_density_rms           0.036
_refine_ls_extinction_coef         0.0050(9)
_refine_ls_extinction_expression  
 'Fc^*^=kFc[1+0.001xFc^2^\l^3^/sin(2\q)]^-1/4^'
_refine_ls_extinction_method       'SHELXL-2018/3 (Sheldrick 2018)'
_refine_ls_goodness_of_fit_ref     1.049
_refine_ls_hydrogen_treatment      mixed
_refine_ls_matrix_type             full
_refine_ls_number_parameters       73
_refine_ls_number_reflns           846
_refine_ls_number_restraints       0
_refine_ls_R_factor_all            0.0318
_refine_ls_R_factor_gt             0.0306
_refine_ls_restrained_S_all        1.049
_refine_ls_shift/su_max            0.000
_refine_ls_shift/su_mean           0.000
_refine_ls_structure_factor_coef   Fsqd
_refine_ls_weighting_details      
 'w=1/[\s^2^(Fo^2^)+(0.0421P)^2^+0.1098P] where P=(Fo^2^+2Fc^2^)/3'
_refine_ls_weighting_scheme        calc
_refine_ls_wR_factor_gt            0.0803
_refine_ls_wR_factor_ref           0.0812
_refine_special_details            ?
_olex2_refinement_description
;
1. Fixed Uiso
 At 1.2 times of:
  All C(H) groups, All C(H,H) groups
2. Others
 Fixed Sof: H4(0.5) H1(0.5)
3.a Aromatic/amide H refined with riding coordinates:
 C6(H6)
3.b X=CH2 refined with riding coordinates:
 C7(H7A,H7B)
;
_atom_sites_solution_hydrogens     mixed
_atom_sites_solution_primary       dual
_atom_sites_solution_secondary     ?
loop_
  _atom_site_label
  _atom_site_type_symbol
  _atom_site_fract_x
  _atom_site_fract_y
  _atom_site_fract_z
  _atom_site_U_iso_or_equiv
  _atom_site_adp_type
  _atom_site_occupancy
  _atom_site_site_symmetry_order
  _atom_site_calc_flag
  _atom_site_refinement_flags_posn
  _atom_site_refinement_flags_adp
  _atom_site_refinement_flags_occupancy
  _atom_site_disorder_assembly
  _atom_site_disorder_group
 N1 N 0.51003(13) 0.27463(11) 0.78840(15) 0.0243(3) Uani 1 1 d . . . . .
 N4 N 0.54966(13) 0.49392(11) 0.78942(15) 0.0257(3) Uani 1 1 d . . . . .
 N3 N 0.71167(13) 0.43719(10) 0.94001(16) 0.0275(3) Uani 1 1 d . . . . .
 N2 N 0.68787(13) 0.30482(10) 0.93867(16) 0.0265(3) Uani 1 1 d . . . . .
 C5 C 0.42530(15) 0.39271(11) 0.69713(18) 0.0222(3) Uani 1 1 d . . . . .
 C6 C 0.23377(16) 0.41089(12) 0.52632(19) 0.0261(3) Uani 1 1 d . . . . .
 H6 H 0.191463 0.502168 0.477963 0.031 Uiso 1 1 calc R U . . .
 C7 C 0.11521(16) 0.30737(13) 0.4346(2) 0.0308(3) Uani 1 1 d . . . . .
 H7A H 0.153719 0.215020 0.479704 0.037 Uiso 1 1 calc R U . . .
 H7B H -0.008432 0.325375 0.323529 0.037 Uiso 1 1 calc R U . . .
 H4 H 0.543(4) 0.582(3) 0.764(4) 0.024(6) Uiso 0.5 1 d . . P . .
 H1 H 0.478(4) 0.191(3) 0.758(4) 0.023(6) Uiso 0.5 1 d . . P . .

loop_
  _atom_site_aniso_label
  _atom_site_aniso_U_11
  _atom_site_aniso_U_22
  _atom_site_aniso_U_33
  _atom_site_aniso_U_23
  _atom_site_aniso_U_13
  _atom_site_aniso_U_12
 N1 0.0223(5) 0.0204(6) 0.0262(5) 0.0002(4) 0.0067(4) 0.0018(4)
 N4 0.0231(5) 0.0219(6) 0.0287(5) 0.0013(4) 0.0077(4) -0.0001(4)
 N3 0.0231(5) 0.0259(5) 0.0286(5) 0.0002(4) 0.0064(4) -0.0012(4)
 N2 0.0210(5) 0.0265(5) 0.0266(5) 0.0011(4) 0.0051(4) 0.0020(4)
 C5 0.0223(6) 0.0211(6) 0.0238(6) 0.0006(4) 0.0104(5) 0.0013(4)
 C6 0.0222(6) 0.0261(6) 0.0278(6) 0.0042(4) 0.0088(5) 0.0053(4)
 C7 0.0220(6) 0.0362(7) 0.0292(6) 0.0012(5) 0.0061(5) 0.0017(5)

_geom_special_details
;
 All esds (except the esd in the dihedral angle between two l.s. planes)
 are estimated using the full covariance matrix.  The cell esds are taken
 into account individually in the estimation of esds in distances, angles
 and torsion angles; correlations between esds in cell parameters are only
 used when they are defined by crystal symmetry.  An approximate (isotropic)
 treatment of cell esds is used for estimating esds involving l.s. planes.
;
loop_
  _geom_bond_atom_site_label_1
  _geom_bond_atom_site_label_2
  _geom_bond_distance
  _geom_bond_site_symmetry_2
  _geom_bond_publ_flag
 N1 N2 1.3535(14) . ?
 N1 C5 1.3311(14) . ?
 N1 H1 0.84(3) . ?
 N4 N3 1.3528(13) . ?
 N4 C5 1.3300(14) . ?
 N4 H4 0.87(3) . ?
 N3 N2 1.2932(15) . ?
 C5 C6 1.4544(16) . ?
 C6 H6 0.9500 . ?
 C6 C7 1.3229(17) . ?
 C7 H7A 0.9500 . ?
 C7 H7B 0.9500 . ?

loop_
  _geom_angle_atom_site_label_1
  _geom_angle_atom_site_label_2
  _geom_angle_atom_site_label_3
  _geom_angle
  _geom_angle_site_symmetry_1
  _geom_angle_site_symmetry_3
  _geom_angle_publ_flag
 N2 N1 H1 119.2(18) . . ?
 C5 N1 N2 107.93(9) . . ?
 C5 N1 H1 132.3(19) . . ?
 N3 N4 H4 120.3(18) . . ?
 C5 N4 N3 108.19(9) . . ?
 C5 N4 H4 131.5(18) . . ?
 N2 N3 N4 108.14(9) . . ?
 N3 N2 N1 108.46(9) . . ?
 N1 C5 C6 127.47(10) . . ?
 N4 C5 N1 107.27(10) . . ?
 N4 C5 C6 125.26(10) . . ?
 C5 C6 H6 118.2 . . ?
 C7 C6 C5 123.63(11) . . ?
 C7 C6 H6 118.2 . . ?
 C6 C7 H7A 120.0 . . ?
 C6 C7 H7B 120.0 . . ?
 H7A C7 H7B 120.0 . . ?

loop_
  _geom_torsion_atom_site_label_1
  _geom_torsion_atom_site_label_2
  _geom_torsion_atom_site_label_3
  _geom_torsion_atom_site_label_4
  _geom_torsion
  _geom_torsion_site_symmetry_1
  _geom_torsion_site_symmetry_2
  _geom_torsion_site_symmetry_3
  _geom_torsion_site_symmetry_4
  _geom_torsion_publ_flag
 N1 C5 C6 C7 -0.79(19) . . . . ?
 N4 N3 N2 N1 -0.39(12) . . . . ?
 N4 C5 C6 C7 178.39(11) . . . . ?
 N3 N4 C5 N1 -0.49(12) . . . . ?
 N3 N4 C5 C6 -179.80(10) . . . . ?
 N2 N1 C5 N4 0.26(12) . . . . ?
 N2 N1 C5 C6 179.55(10) . . . . ?
 C5 N1 N2 N3 0.09(12) . . . . ?
 C5 N4 N3 N2 0.55(12) . . . . ?

_shelx_res_file
;
TITL 5-vt_a.res in P2(1)/c
    5-vt.res
    created by SHELXL-2018/3 at 13:04:07 on 12-Dec-2022
REM Old TITL 5-VT in P2(1)/c
REM SHELXT solution in P2(1)/c: R1 0.111, Rweak 0.042, Alpha 0.013
REM <I/s> 0.268 for 60 systematic absences, Orientation as input
REM Formula found by SHELXT: C7
CELL 1.54184 7.7861 9.6722 6.7435 90 115.263 90
ZERR 4 0.0003 0.0003 0.0003 0 0.005 0
LATT 1
SYMM -X,0.5+Y,0.5-Z
SFAC C H N
UNIT 12 16 16

L.S. 4 0 0
PLAN  3
SIZE 0.03 0.06 0.1
TEMP -173(2)
CONF
BOND
list 4
MORE -1
BOND $H
fmap 2 53
acta
REM <olex2.extras>
REM <HklSrc "%.\\5-VT.hkl">
REM </olex2.extras>

WGHT    0.042100    0.109800
EXTI    0.004990
FVAR       0.88615
N1    3    0.510031    0.274625    0.788396    11.00000    0.02232    0.02040 =
         0.02622    0.00022    0.00667    0.00179
N4    3    0.549658    0.493915    0.789419    11.00000    0.02308    0.02187 =
         0.02875    0.00131    0.00773   -0.00005
N3    3    0.711669    0.437191    0.940014    11.00000    0.02310    0.02592 =
         0.02864    0.00023    0.00639   -0.00116
N2    3    0.687874    0.304815    0.938672    11.00000    0.02103    0.02649 =
         0.02663    0.00109    0.00508    0.00196
C5    1    0.425296    0.392708    0.697126    11.00000    0.02233    0.02107 =
         0.02384    0.00058    0.01045    0.00126
C6    1    0.233767    0.410895    0.526316    11.00000    0.02221    0.02614 =
         0.02785    0.00415    0.00879    0.00532
AFIX  43
H6    2    0.191463    0.502168    0.477963    11.00000   -1.20000
AFIX   0
C7    1    0.115212    0.307369    0.434562    11.00000    0.02196    0.03621 =
         0.02919    0.00119    0.00608    0.00166
AFIX  93
H7A   2    0.153719    0.215020    0.479704    11.00000   -1.20000
H7B   2   -0.008432    0.325375    0.323529    11.00000   -1.20000
AFIX   0
H4    2    0.543079    0.582433    0.764086    10.50000    0.02376
H1    2    0.478416    0.191296    0.757998    10.50000    0.02270
HKLF 4


REM  5-vt_a.res in P2(1)/c
REM wR2 = 0.0812, GooF = S = 1.049, Restrained GooF = 1.049 for all data
REM R1 = 0.0306 for 797 Fo > 4sig(Fo) and 0.0318 for all 846 data
REM 73 parameters refined using 0 restraints

END

WGHT      0.0420      0.1098

REM Highest difference peak  0.228,  deepest hole -0.143,  1-sigma level  0.036
Q1    1   0.3364  0.3995  0.6173  11.00000  0.05    0.23
Q2    1   0.8124  0.4750  1.0413  11.00000  0.05    0.15
Q3    1   0.7948  0.2735  1.0414  11.00000  0.05    0.14
;
_shelx_res_checksum                19518
_shelx_hkl_file
;
   0   0  -1   -0.01    0.08
   0   0   1    0.01    0.08
   0   0  -1   -0.04    0.12
   0   0  -1    0.03    0.13
   0   0  -1   -0.05    0.11
   0   0  -1   -0.01    0.06
   0   0  -1    0.02    0.12
   0   0  -2   41.81    1.83
   0   0  -2   44.27    1.92
   0   0  -2   44.94    1.82
   0   0  -2   46.16    2.00
   0   0  -3   -0.06    0.21
   0   0  -3    0.32    0.22
   0   0  -3   -0.14    0.27
   0   0  -4  319.81   11.29
   0   0  -5   -0.12    0.30
   0   0  -5    0.12    0.24
   0   0  -6   30.51    1.72
   0   0  -6   31.55    1.77
   0   0  -7    0.04    0.18
   0   0  -7    0.08    0.19
   0   1   0   -0.03    0.06
   0  -1   0    0.03    0.05
   0  -1   1   12.26    0.56
   0   1  -1   12.67    0.63
   0   1  -1   11.48    0.61
   0   1  -1   12.82    0.65
   0   1  -1   13.45    0.67
   0  -1  -1   12.62    0.65
   0   1  -1   13.06    0.59
   0   1  -1   12.68    0.63
   0  -1  -1   10.59    0.56
   0   1   1   13.14    0.67
   0  -1  -2  670.26   20.79
   0   1   2  671.29   20.79
   0   1  -2  644.95   20.91
   0   1  -2  660.33   20.72
   0  -1  -3   26.66    1.62
   0   1  -3   25.32    1.58
   0  -1  -3   25.09    1.54
   0  -1  -3   23.39    1.44
   0   1  -4  127.36    5.21
   0  -1  -4  127.16    5.21
   0  -1  -5    4.93    0.64
   0   1  -5    4.78    0.64
   0  -1  -5    4.73    0.62
   0  -1  -5    4.06    0.58
   0   1  -5    4.55    0.64
   0  -1  -6   48.03    2.38
   0   1  -6   49.46    2.38
   0  -1  -6   50.14    2.37
   0   1  -6   51.89    2.45
   0   1  -6   51.15    2.44
   0  -1  -7   28.38    1.43
   0   1  -7   28.30    1.41
   0  -1  -7   28.74    1.42
   0   1  -7   32.02    1.49
   0   2   0   12.90    0.60
   0  -2   0   12.24    0.63
   0   2   0   14.34    0.72
   0   2   0   12.33    0.55
   0   2   1  625.74   20.54
   0   2  -1  636.24   20.46
   0  -2  -1  645.97   20.37
   0  -2   1  649.35   20.42
   0   2  -1  647.59   20.35
   0   2  -1  653.98   20.45
   0   2  -1  641.77   20.27
   0  -2  -1  637.10   20.54
   0   2  -2    7.88    0.68
   0   2  -2    9.34    0.71
   0   2  -2    7.96    0.69
   0   2  -2    8.61    0.68
   0  -2  -2    7.78    0.67
   0   2   2    8.50    0.71
   0  -2  -2    7.82    0.70
   0  -2  -2    9.78    0.72
   0   2  -3   27.20    1.59
   0  -2  -3   26.47    1.57
   0  -2  -3   27.96    1.65
   0   2  -3   27.22    1.53
   0   2  -4    8.00    0.96
   0  -2  -4    9.73    1.03
   0  -2  -5   59.84    2.73
   0  -2  -5   61.12    2.69
   0  -2  -5   58.47    2.70
   0   2  -5   58.90    2.69
   0  -2  -5   57.53    2.71
   0   2  -5   59.75    2.74
   0   2  -6   14.47    1.12
   0  -2  -6   13.26    1.03
   0  -2  -6   13.97    1.08
   0   2  -6   14.42    1.08
   0  -2  -6   12.10    1.00
   0   2  -7   34.91    1.58
   0  -2  -7   33.24    1.58
   0   2  -7   35.50    1.62
   0   3   0   -0.04    0.14
   0   3   0    0.04    0.20
   0  -3   0    0.05    0.14
   0   3   0    0.26    0.16
   0   3  -1   40.38    1.82
   0  -3  -1   38.65    1.89
   0   3   1   44.74    1.89
   0   3   1   46.15    1.96
   0  -3   1   46.18    1.87
   0   3  -2  218.18    7.41
   0   3  -2  215.16    7.51
   0   3  -2  214.92    7.36
   0  -3  -2  223.28    7.60
   0  -3  -3   62.00    2.86
   0  -3  -3   60.05    2.93
   0   3  -3   56.01    2.79
   0   3  -3   58.06    2.79
   0   3  -4   46.35    2.17
   0   3  -4   45.70    2.16
   0   3  -4   45.46    2.61
   0   3  -4   44.70    2.11
   0   3  -4   45.19    2.15
   0  -3  -4   45.50    2.59
   0  -3  -4   48.96    2.22
   0  -3  -4   46.05    2.12
   0   3  -5   20.06    1.30
   0   3  -5   20.53    1.36
   0  -3  -5   18.78    1.28
   0   3  -5   18.82    1.29
   0  -3  -5   16.53    1.19
   0  -3  -5   17.45    1.27
   0   3  -5   17.29    1.25
   0   3  -6   79.46    3.31
   0   3  -6   81.76    3.39
   0  -3  -6   82.38    3.36
   0   3  -6   80.23    3.32
   0  -3  -6   80.04    3.34
   0   3  -7    7.70    0.58
   0   3  -7    8.53    0.62
   0  -3  -7    7.68    0.59
   0  -3  -7    7.86    0.58
   0   4   0  269.32    9.22
   0  -4   1   27.97    1.51
   0   4  -1   33.98    1.66
   0  -4  -1   29.61    1.59
   0   4   1   32.60    1.65
   0   4  -1   29.06    1.49
   0  -4  -2  152.34    5.81
   0   4   2  154.89    5.83
   0   4  -2  143.52    5.74
   0   4  -2  153.80    5.67
   0   4  -2  153.36    5.63
   0   4   3   91.77    4.08
   0  -4  -3   84.48    4.01
   0   4  -3   87.41    3.89
   0  -4  -3   92.42    3.95
   0   4  -4   12.30    0.98
   0  -4  -4   11.10    1.20
   0   4  -4   11.49    0.96
   0  -4  -4   12.76    0.99
   0   4  -4    8.94    0.87
   0  -4  -4   12.30    0.95
   0  -4  -5   22.69    1.41
   0  -4  -5   22.15    1.46
   0   4  -5   21.33    1.43
   0   4  -5   21.15    1.38
   0  -4  -5   21.00    1.39
   0   4  -5   21.87    1.44
   0  -4  -6   14.01    1.00
   0   4  -6   13.15    0.96
   0  -4  -6   14.12    1.02
   0   4  -6   12.99    1.02
   0   4  -6   13.79    1.02
   0   5   0    0.07    0.26
   0  -5   0    0.06    0.22
   0  -5  -1  210.95    7.70
   0   5   1  224.40    7.75
   0   5  -1  211.00    7.75
   0  -5   1  204.40    7.63
   0   5   2   52.76    2.78
   0   5  -2   52.60    2.77
   0   5  -2   53.17    2.64
   0   5  -2   52.56    2.64
   0  -5  -2   60.64    2.91
   0  -5  -3   74.69    3.51
   0   5   3   76.54    3.71
   0   5  -3   75.23    3.00
   0   5  -3   69.10    2.91
   0   5  -3   70.43    3.43
   0   5  -3   69.84    2.92
   0  -5  -3   61.64    3.50
   0   5   3   73.63    3.03
   0   5  -3   63.81    2.86
   0   5  -4   10.40    0.93
   0   5  -4    8.60    0.86
   0  -5  -4    8.39    0.85
   0  -5  -4    8.92    0.84
   0   5   4   10.02    0.93
   0   5  -5  192.46    7.06
   0  -5  -5  195.92    7.03
   0   5  -5  191.04    7.07
   0  -5  -5  196.99    7.10
   0  -5  -5  199.81    7.03
   0   5  -6   16.82    1.10
   0   5  -6   17.46    1.11
   0  -5  -6   18.28    1.11
   0   6   0   27.62    1.86
   0  -6   0   28.97    1.85
   0  -6  -1   44.65    2.41
   0   6  -1   47.56    2.53
   0  -6  -2   14.64    1.02
   0   6  -2   11.64    1.29
   0   6  -2   11.85    0.94
   0   6   2   14.55    1.39
   0   6   2   14.11    1.01
   0   6  -2   13.20    1.25
   0   6  -2   14.68    1.05
   0   6  -2   13.45    1.00
   0   6   2   14.91    1.03
   0   6  -2   14.11    1.24
   0   6  -3    5.64    0.70
   0   6  -3    6.16    0.73
   0   6   3    6.17    0.72
   0   6   4    7.73    0.87
   0   6  -4    8.63    0.88
   0   6  -4    9.46    0.90
   0   6  -4    8.80    0.86
   0  -6  -4   11.32    0.95
   0  -6  -5   24.39    1.44
   0   6   5   23.02    1.43
   0   6  -5   24.92    1.47
   0   6  -5   22.08    1.40
   0  -6  -5   22.74    1.39
   0   6   6    6.85    0.60
   0   6  -6    5.59    0.55
   0   6  -6    5.66    0.54
   0   7   0   -0.11    0.27
   0   7   0    0.12    0.31
   0  -7   0   -0.11    0.36
   0  -7  -1   23.60    1.92
   0   7  -1   25.59    2.00
   0   7  -1   25.04    1.87
   0   7  -1   24.99    1.48
   0   7  -1   26.90    1.57
   0  -7   1   26.20    1.96
   0  -7  -1   29.39    2.05
   0   7   1   29.96    1.64
   0   7   1   29.45    1.61
   0  -7  -1   28.33    1.53
   0   7  -1   26.64    1.59
   0   7   2  144.91    5.52
   0   7  -2  154.37    5.58
   0   7   2  153.26    5.59
   0   7  -2  137.94    5.46
   0  -7  -2  149.06    5.54
   0   7  -2  148.41    5.60
   0   7  -3    0.73    0.33
   0   7  -3    0.79    0.37
   0   7   3    1.00    0.39
   0   7  -4   29.69    1.71
   0   7  -4   30.98    1.69
   0  -7  -4   32.80    1.76
   0   7   4   31.73    1.81
   0   7   5    5.55    0.62
   0   7  -5    6.74    0.67
   0  -7  -5    5.68    0.61
   0   7  -5    4.90    0.58
   0   8   0   31.33    1.84
   0   8   0   29.26    1.73
   0   8   1   79.72    3.38
   0   8  -1   77.19    3.39
   0   8   1   78.42    3.37
   0   8  -1   69.70    3.30
   0   8  -1   78.81    3.31
   0  -8  -2  331.04   11.58
   0   8  -2  346.47   11.71
   0   8  -3    1.28    0.47
   0   8   3    0.97    0.41
   0   8  -4    5.98    0.64
   0  -8  -4    6.15    0.68
   0   8  -4    6.04    0.68
   0   8  -5    7.97    0.63
   0   8   5    7.55    0.63
   0  -8  -5    7.51    0.61
   0   9   0    0.33    0.32
   0   9   0   -0.07    0.29
   0   9   0    0.07    0.32
   0   9  -1   14.08    1.10
   0   9  -1   12.66    1.12
   0   9  -1   14.74    1.17
   0   9   1   12.52    1.10
   0  -9  -2   11.37    0.98
   0   9  -2   12.44    1.08
   0   9   3   26.56    1.49
   0   9  -3   24.58    1.52
   0   9   4   53.43    2.23
   0  -9  -4   51.87    2.18
   0   9  -4   50.69    2.15
   0   9  -4   50.19    2.16
   0  10   0  206.62    7.41
   0  10   0  203.40    7.41
   0  10   0  212.09    7.51
   0  10   1   40.84    2.03
   0  10   1   43.58    2.09
   0  10  -1   39.87    2.02
   0  10  -1   36.83    2.02
   0  10  -1   38.90    2.04
   0  10   2    0.86    0.31
   0  10  -2    1.13    0.39
   0  10   3   56.81    2.29
   0  10  -3   55.91    2.35
   0 -10  -3   51.22    2.20
   0  10  -3   52.17    2.22
   0  11   0    0.04    0.19
   0  11   0    0.09    0.23
   0  11   1   23.52    1.25
   0  11  -1   21.03    1.23
   0  11  -1   23.02    1.28
   0  11  -2   -0.19    0.20
   0  11  -2    0.03    0.15
   0  11   2    0.07    0.16
   0  11  -2    0.12    0.16
   1   0  -7    0.33    0.24
   1   0  -6  129.03    4.93
   1   0  -6  125.33    4.93
   1   0  -5    0.11    0.23
   1   0  -5    0.06    0.24
   1   0  -4    3.37    0.65
   1   0  -4    3.92    0.64
   1   0  -3    0.06    0.26
   1   0  -3   -0.06    0.27
   1   0  -3    0.24    0.22
   1   0  -3    0.05    0.23
   1   0  -2 4602.90  141.35
   1   0  -2 4625.21  141.31
   1   0  -2 4642.26  141.45
   1   0  -2 4636.76  141.33
   1   0  -2 4132.14  141.12
   1   0  -2 4664.46  141.36
   1   0  -2 4655.37  141.45
   1   0  -1    0.05    0.14
   1   0  -1    0.09    0.11
   1   0  -1    0.01    0.09
   1   0  -1    0.02    0.11
   1   0  -1    0.03    0.11
  -1   0   1   -0.01    0.06
   1   0  -1    0.07    0.14
   1   0   0 2908.43   88.81
   1   0   0 2894.66   88.78
  -1   0   0 2927.01   88.83
  -1   0   0 2793.13   88.62
  -1   0  -1   -0.09    0.15
  -1   0  -1    0.04    0.14
  -1   0  -1    0.03    0.18
  -1   0  -1    0.07    0.14
  -1   0  -2  205.23    6.90
  -1   0  -2  194.82    7.11
  -1   0  -3   -0.17    0.27
  -1   0  -4  303.60   10.24
  -1   0  -4  299.17   10.25
  -1   0  -4  276.24   11.13
  -1   0  -4  314.94   10.28
  -1   0  -5    0.12    0.26
  -1   0  -5    0.06    0.27
  -1   0  -5    0.13    0.26
  -1   0  -6  104.87    3.95
  -1   0  -6   95.66    3.93
   1  -1  -7    6.65    0.67
   1   1  -7    7.69    0.69
   1   1  -7    7.02    0.68
   1   1  -6    1.57    0.42
   1  -1  -6    0.92    0.35
   1  -1  -6    1.74    0.41
   1   1  -6    1.27    0.38
   1  -1  -5   14.82    1.08
   1   1  -5   14.93    1.07
   1   1  -5   17.62    1.17
   1   1  -5   12.32    1.30
   1  -1  -5   14.53    1.41
   1  -1  -5   13.75    1.04
   1  -1  -4   45.53    2.47
   1   1  -4   42.51    2.49
   1  -1  -4   42.32    2.48
   1  -1  -4   39.77    2.25
   1   1  -4   41.35    2.26
   1  -1  -3  122.20    4.76
   1   1  -3  109.98    4.78
   1  -1  -3  121.30    4.58
   1  -1  -3  118.85    4.72
   1  -1  -3  128.82    4.60
   1   1  -2   13.22    0.77
   1  -1  -2   11.84    0.75
   1  -1  -2   13.18    0.77
   1   1  -2   12.39    0.76
   1   1  -2   12.40    0.72
   1  -1  -2   10.64    0.77
   1  -1  -2   12.72    0.76
   1   1  -2   12.10    0.84
  -1  -1   1   26.85    1.12
   1   1  -1   29.50    1.17
   1   1  -1   30.85    1.24
   1   1  -1   30.11    1.15
   1   1  -1   26.65    1.01
   1   1  -1   28.60    1.17
   1  -1  -1   30.20    1.15
   1  -1  -1   28.93    1.10
   1   1  -1   28.43    1.14
   1  -1  -1   32.19    1.15
   1  -1  -1   29.20    1.04
   1   1  -1   29.87    1.22
  -1   1   1   30.57    1.25
   1  -1   0    0.52    0.08
  -1  -1   0    0.66    0.18
   1   1   0    0.69    0.16
   1  -1   0    0.61    0.16
   1  -1   0    0.62    0.16
  -1  -1  -1  463.07   15.07
  -1  -1  -1  439.70   15.01
   1  -1   1  486.67   14.92
  -1   1  -1  472.43   15.07
  -1   1  -1  481.27   14.91
  -1  -1  -1  450.13   14.91
  -1   1  -2    8.16    0.66
  -1   1  -2    7.59    0.72
  -1  -1  -2    8.57    0.77
  -1  -1  -2    7.57    0.65
  -1   1  -3   65.25    3.18
  -1  -1  -3   66.87    2.96
  -1  -1  -3   64.10    3.17
  -1  -1  -4    0.32    0.25
  -1   1  -4    0.89    0.30
  -1  -1  -4    0.48    0.27
  -1   1  -4    0.58    0.26
  -1   1  -4    0.88    0.31
  -1  -1  -4    1.08    0.32
  -1  -1  -5   42.68    2.10
  -1   1  -5   40.21    2.10
  -1  -1  -5   44.15    2.17
  -1   1  -5   38.65    2.08
  -1  -1  -5   40.88    2.10
  -1  -1  -6   26.58    1.52
  -1   1  -6   26.07    1.53
  -1  -1  -6   29.07    1.52
  -1   1  -6   26.23    1.50
   1   2  -7    3.77    0.49
   1  -2  -7    4.54    0.52
   1   2  -7    3.91    0.49
   1   2  -6   18.50    1.31
   1  -2  -6   21.69    1.39
   1  -2  -6   21.19    1.37
   1   2  -6   23.46    1.47
   1  -2  -6   23.47    1.43
   1  -2  -5   32.69    1.75
   1   2  -5   32.67    1.75
   1   2  -5   29.46    1.66
   1   2  -5   33.14    1.78
   1  -2  -5   30.20    1.70
   1   2  -4    7.59    1.00
   1  -2  -4    8.29    0.93
   1  -2  -4    7.95    0.97
   1   2  -4    8.21    0.94
   1  -2  -3  132.22    4.62
   1  -2  -3  123.85    4.64
   1   2  -3  125.21    4.52
   1   2  -3  123.23    4.60
   1   2  -2   56.21    2.21
   1  -2  -2   52.44    2.31
   1   2  -2   59.33    2.41
   1   2  -2   55.69    2.31
   1   2  -2   55.99    2.27
   1   2  -2   56.34    2.28
   1  -2  -2   52.81    2.33
   1   2  -1 4159.49  133.33
   1   2  -1 4305.09  133.51
   1   2  -1 4306.51  133.59
   1   2  -1 4332.97  133.50
   1  -2  -1 4323.96  133.48
  -1  -2   0  116.98    3.99
   1   2   0  113.08    3.90
   1   2   0  108.63    3.87
   1  -2   0  108.63    3.91
  -1   2   0  114.94    3.90
   1  -2   1  275.89    9.01
  -1   2  -1  267.89    8.87
  -1   2  -1  272.88    9.00
  -1  -2  -1  271.82    9.06
  -1  -2  -1  265.19    8.99
  -1   2  -1  272.44    8.93
   1   2   1  278.05    9.13
  -1  -2  -2   55.73    2.54
  -1   2  -2   54.48    2.39
  -1   2  -2   57.34    2.45
  -1  -2  -2   58.05    2.44
  -1   2  -2   54.70    2.50
  -1  -2  -3   62.00    3.05
  -1  -2  -3   60.21    2.81
  -1   2  -3   58.04    2.95
  -1   2  -4    2.67    0.47
  -1   2  -4    2.74    0.45
  -1  -2  -4    2.52    0.46
  -1   2  -4    2.83    0.48
  -1  -2  -4    2.18    0.43
  -1  -2  -4    2.17    0.42
  -1  -2  -5    2.77    0.52
  -1   2  -5    4.11    0.62
  -1   2  -5    2.51    0.50
  -1   2  -5    3.05    0.53
  -1  -2  -5    2.81    0.53
  -1   2  -6    7.23    0.74
  -1  -2  -6    8.19    0.77
  -1   2  -6    7.52    0.74
  -1  -2  -6    7.56    0.72
   1  -3  -7    0.04    0.18
   1  -3  -7   -0.04    0.18
   1   3  -7    0.04    0.22
   1   3  -6   93.87    3.80
   1  -3  -6   86.79    3.70
   1  -3  -6   90.84    3.70
   1   3  -6   89.85    3.71
   1  -3  -6   93.55    3.77
   1   3  -5  102.44    4.06
   1  -3  -5   95.74    4.02
   1   3  -5  102.22    4.03
   1   3  -5   99.64    4.05
   1  -3  -4   67.33    3.11
   1   3  -4   66.45    3.13
   1   3  -3    8.62    0.92
   1   3  -3    7.75    0.84
   1  -3  -3   10.39    0.90
   1  -3  -3    8.49    0.87
   1   3  -3    8.49    0.83
  -1   3   3    9.78    0.94
   1   3  -2   37.52    1.80
   1   3  -2   38.48    1.79
   1  -3  -2   34.72    1.86
   1   3  -2   37.60    1.89
   1   3  -1   87.04    3.19
   1   3  -1   75.55    3.04
   1   3  -1   81.27    3.16
   1  -3  -1   84.86    3.12
   1   3   0   49.34    2.03
  -1  -3   0   52.15    2.19
   1  -3   0   48.46    2.10
   1   3   0   52.63    2.05
   1   3   0   53.21    2.12
  -1   3   0   47.05    1.98
  -1  -3  -1   23.79    1.38
   1  -3   1   25.11    1.35
   1   3   1   27.69    1.48
  -1   3  -1   25.11    1.35
  -1   3  -1   28.57    1.31
  -1   3  -2   49.05    2.32
  -1  -3  -3  247.62    8.63
  -1   3  -3  229.53    8.57
  -1  -3  -3  233.94    8.79
  -1   3  -4  221.09    7.69
  -1  -3  -4  206.03    7.57
  -1   3  -4  221.26    7.62
  -1  -3  -4  209.43    7.66
  -1   3  -4  219.57    7.64
  -1   3  -5    4.20    0.60
  -1  -3  -5    3.93    0.61
  -1   3  -5    4.38    0.63
  -1  -3  -5    3.66    0.57
  -1   3  -5    3.66    0.59
  -1   3  -6    0.19    0.25
  -1  -3  -6    0.99    0.30
  -1  -3  -6    0.58    0.27
  -1   3  -6    0.14    0.25
  -1   3  -6    0.09    0.21
   1  -4  -7    2.18    0.34
   1   4  -7    1.89    0.34
   1  -4  -6    0.06    0.24
   1   4  -6    0.18    0.29
   1   4  -6    0.06    0.22
   1   4  -5    0.06    0.27
   1  -4  -5   -0.13    0.26
   1   4  -5    0.06    0.26
   1   4  -4   48.51    2.20
   1   4  -4   48.87    2.70
   1   4  -4   48.30    2.27
   1   4  -4   47.76    2.26
   1  -4  -4   46.85    2.71
   1   4  -4   48.08    2.25
   1   4  -4   51.81    2.31
   1  -4  -4   51.47    2.26
   1   4  -4   51.50    2.32
   1  -4  -3    1.86    0.46
   1   4  -3    1.96    0.46
   1   4  -3    1.98    0.52
  -1   4   3    2.74    0.57
  -1   4   2  105.42    4.40
   1   4  -2  113.26    4.33
   1   4  -2  109.53    4.45
   1   4  -2  108.97    4.26
   1   4  -1    5.60    0.64
   1   4  -1    5.77    0.57
   1  -4  -1    6.02    0.62
  -1   4   1    6.40    0.66
   1   4   0  265.03    8.86
  -1  -4   0  274.31    9.02
  -1  -4  -1  101.43    4.20
   1  -4   1  102.62    4.12
  -1   4  -1  108.22    4.04
   1   4   1  105.42    4.24
  -1   4  -1  104.75    4.08
  -1  -4  -1  112.51    4.26
  -1   4  -2  155.68    6.02
  -1  -4  -2  164.78    6.25
  -1   4  -3   42.37    1.95
  -1  -4  -3   41.54    1.93
  -1  -4  -3   37.14    2.40
  -1  -4  -3   38.75    1.88
  -1  -4  -3   38.63    2.27
  -1   4  -3   37.17    1.85
  -1   4  -3   37.99    2.28
  -1   4  -4   13.30    1.03
  -1  -4  -4   12.71    1.01
  -1   4  -4   12.64    1.04
  -1  -4  -4   12.18    1.01
  -1   4  -5   61.07    2.73
  -1   4  -5   57.44    2.65
  -1  -4  -5   58.02    2.68
  -1   4  -5   56.99    2.63
  -1  -4  -5   56.72    2.66
  -1   4  -6    7.92    0.69
  -1   4  -6    7.64    0.68
  -1  -4  -6    7.02    0.66
  -1  -4  -6    9.04    0.71
   1   5  -7  139.41    4.81
   1   5  -6    6.10    0.68
   1  -5  -6    6.04    0.67
   1   5  -6    4.84    0.62
   1  -5  -6    5.56    0.66
  -1   5   5    2.71    0.51
   1   5  -5    2.08    0.50
   1  -5  -5    2.48    0.49
   1   5  -5    2.82    0.53
   1   5  -5    2.73    0.54
   1   5  -5    2.45    0.58
   1  -5  -5    2.79    0.51
   1  -5  -4   19.54    1.26
   1   5  -4   20.63    1.31
   1   5  -4   18.19    1.26
   1   5  -4   19.50    1.28
   1   5  -4   21.33    1.34
   1   5  -4   19.39    1.30
   1   5  -4   18.25    1.22
   1   5  -3  335.07   12.63
   1   5  -3  334.36   12.32
   1   5  -2   87.18    3.84
   1   5  -2   95.95    3.98
   1   5  -2   94.15    4.13
  -1   5   2   95.74    4.13
  -1   5   1    1.61    0.43
  -1   5   1    2.54    0.47
   1  -5  -1    2.81    0.51
   1  -5   0   86.91    3.80
  -1  -5   0   92.93    3.94
  -1   5   0   93.92    3.91
   1  -5   1  687.56   21.65
  -1   5  -1  660.99   21.45
  -1  -5  -1  667.25   21.66
   1   5   1  589.64   21.58
  -1   5  -1  656.39   21.42
  -1  -5  -1  668.36   21.76
  -1   5  -2   20.73    1.50
  -1  -5  -2   19.08    1.56
  -1   5  -3   20.10    1.35
  -1  -5  -3   21.73    1.34
  -1   5  -3   21.86    1.35
  -1   5  -3   21.95    1.32
  -1  -5  -3   22.09    1.71
   1   5   3   23.77    1.42
  -1   5  -3   24.34    1.43
  -1   5  -3   22.25    1.73
  -1  -5  -4    9.19    0.87
  -1  -5  -4    8.67    0.85
  -1   5  -4    8.04    0.81
  -1   5  -4    8.56    0.86
  -1  -5  -5  207.65    7.32
  -1  -5  -5  205.81    7.32
  -1   5  -5  202.97    7.32
  -1   5  -6   35.57    1.60
  -1  -5  -6   34.49    1.55
  -1  -5  -6   33.46    1.55
   1   5   6   34.13    1.58
   1   6  -6   13.10    0.94
   1  -6  -6   13.08    0.91
   1   6  -6   12.57    0.93
   1  -6  -6   13.95    0.95
   1  -6  -5    1.03    0.37
  -1   6   5    0.39    0.28
   1   6  -5    0.99    0.35
   1  -6  -5    0.94    0.33
   1   6  -5    1.05    0.40
   1   6  -5    0.93    0.39
   1   6  -4   34.07    1.84
   1   6  -4   37.14    1.95
  -1   6   4   35.34    1.98
   1  -6  -4   34.22    1.85
   1   6  -4   33.33    1.88
   1   6  -4   39.03    2.01
   1  -6  -3   56.57    2.54
  -1   6   3   54.98    3.15
   1   6  -3   53.43    2.47
  -1   6   3   53.40    2.53
   1   6  -3   55.05    2.50
   1   6  -3   56.88    2.55
   1   6  -3   54.02    2.95
   1   6  -2   26.66    1.74
   1   6  -2   24.81    1.89
  -1   6   2   25.89    1.89
   1   6  -2   26.25    1.81
  -1  -6   1  380.71   13.27
   1  -6  -1  379.26   13.29
  -1   6   1  385.58   13.38
  -1  -6   0   18.75    1.50
   1  -6   0   15.09    1.34
  -1   6   0   18.84    1.48
  -1  -6  -1   21.90    1.68
   1  -6   1   18.77    1.53
  -1   6  -1   19.81    1.60
  -1   6  -2   21.87    1.69
   1   6   2   24.66    1.44
  -1  -6  -2   22.94    1.85
  -1   6  -2   24.39    1.47
  -1   6  -2   23.35    1.42
   1   6   3    2.39    0.47
  -1   6  -3    1.56    0.43
  -1   6  -3    1.21    0.44
  -1  -6  -4   16.91    1.22
   1   6   4   17.92    1.28
  -1   6  -4   18.52    1.27
   1   6   5   82.81    3.37
  -1   6  -5   82.52    3.31
  -1  -6  -5   81.00    3.28
  -1   7   6    4.06    0.43
   1  -7  -6    3.86    0.41
   1   7  -6    3.69    0.40
   1  -7  -5   27.44    1.44
   1   7  -5   21.88    1.33
  -1   7   5   23.42    1.45
   1   7  -5   23.55    1.42
   1   7  -5   24.15    1.43
   1   7  -5   25.14    1.44
   1   7  -4   -0.06    0.31
  -1   7   4    0.07    0.26
   1   7  -4    0.12    0.27
   1  -7  -4   -0.06    0.26
   1   7  -4    0.31    0.30
   1  -7  -3   37.15    1.96
  -1   7   3   33.86    1.90
   1   7  -2   33.85    1.85
   1   7  -2   35.56    1.91
   1  -7  -2   35.23    1.87
  -1   7   2   37.23    1.94
   1  -7  -1    6.95    0.99
  -1   7   1    5.73    0.89
  -1  -7   1    5.96    0.92
   1   7  -1    6.34    0.72
  -1   7   1    5.90    0.69
   1   7  -1    5.61    0.85
   1   7  -1    7.90    0.77
   1  -7  -1    5.85    0.66
  -1  -7   1    4.52    0.83
  -1   7   1    6.02    0.68
   1   7  -1    4.48    0.58
  -1  -7   0  147.05    6.42
   1   7   0  162.40    5.70
   1   7   0  158.17    5.69
  -1  -7   0  145.49    6.25
  -1   7   0  141.18    5.55
   1  -7   0  150.42    6.32
  -1   7   0  152.53    6.40
   1   7   1   46.05    2.21
  -1  -7  -1   43.63    2.81
  -1   7  -1   42.68    2.24
  -1   7  -1   48.90    2.90
   1   7   2    6.82    0.76
  -1   7  -2    5.83    0.75
  -1   7  -2    5.42    0.70
   1   7   3   80.57    3.38
  -1  -7  -3   72.13    3.21
  -1   7  -3   75.14    3.36
  -1   7  -3   77.12    3.34
   1   7   4   33.00    1.77
  -1   7  -4   29.74    1.73
  -1   7  -4   31.73    1.74
  -1  -7  -4   33.47    1.73
  -1   7  -5    4.61    0.51
  -1  -7  -5    5.39    0.53
   1   7   5    5.24    0.54
   1  -8  -5   11.11    0.79
   1   8  -5   10.47    0.78
  -1   8   5    9.94    0.79
   1   8  -5    9.26    0.73
  -1   8   4  109.34    4.41
   1   8  -4  114.27    4.38
   1   8  -4  116.31    4.38
   1  -8  -4  111.75    4.34
  -1   8   3    0.33    0.30
  -1   8   3   -0.44    0.31
   1  -8  -3    0.07    0.29
   1   8  -3   -0.20    0.32
   1  -8  -2   23.70    1.49
  -1   8   2   22.31    1.49
   1   8  -2   20.96    1.42
   1   8  -2   20.95    1.46
   1  -8  -1  213.97    7.67
  -1   8   1  215.03    7.71
   1   8  -1  215.22    7.75
   1   8  -1  214.82    7.67
  -1   8   1  200.99    7.69
   1   8  -1  221.46    7.78
   1   8   0   96.32    3.88
   1   8   0   90.26    3.94
  -1   8   0   97.31    4.01
   1   8   0   94.69    3.95
   1  -8   0   94.11    3.86
  -1   8   0   94.58    3.85
  -1   8  -1    0.07    0.27
   1   8   1    0.07    0.29
  -1   8  -1   -0.07    0.33
  -1   8  -1    0.06    0.26
  -1   8  -2  128.40    5.00
   1   8   2  125.07    4.88
  -1   8  -2  121.47    4.88
   1   8   3   28.77    1.63
  -1  -8  -3   26.34    1.52
  -1   8  -3   24.51    1.59
  -1   8  -3   26.22    1.60
   1   8   4   25.51    1.40
  -1  -8  -4   25.10    1.35
  -1   8  -4   23.72    1.39
   1  -9  -5   24.21    1.13
   1   9  -5   25.48    1.15
  -1   9   5   22.05    1.12
   1   9  -4    0.13    0.23
   1  -9  -4   -0.04    0.21
  -1   9   4   -0.05    0.19
   1   9  -4   -0.08    0.22
   1  -9  -4   -0.04    0.22
   1   9  -3    0.67    0.33
   1   9  -3    0.84    0.34
  -1   9   2    3.63    0.61
   1   9  -2    3.84    0.63
   1  -9  -2    3.06    0.57
   1  -9  -1    3.86    0.61
   1   9  -1    3.46    0.62
  -1   9   1    3.27    0.61
   1   9  -1    3.62    0.65
  -1   9   1    3.61    0.60
   1   9  -1    4.09    0.61
  -1   9   0    1.51    0.40
  -1   9   0    1.37    0.46
   1   9   0    1.11    0.41
   1   9   0    1.00    0.40
   1   9   0    1.28    0.38
   1   9   1    2.82    0.52
  -1   9  -1    2.77    0.53
   1   9   1    2.79    0.53
  -1   9  -1    2.83    0.55
  -1   9  -1    3.69    0.61
  -1   9  -2    3.19    0.57
   1   9   2    4.21    0.57
   1   9   3   33.71    1.74
  -1   9  -3   37.13    1.87
   1   9   4   14.10    0.85
  -1  -9  -4   13.85    0.80
  -1   9  -4   13.42    0.81
  -1   9  -4   11.88    0.82
   1 -10  -4    9.96    0.65
   1  10  -4   10.35    0.65
  -1  10   4    9.24    0.64
   1 -10  -4    8.07    0.61
   1  10  -3   92.76    3.79
   1  10  -3  100.11    3.72
   1  10  -3   99.21    3.72
   1 -10  -3  105.79    3.78
   1 -10  -2   64.84    2.87
   1  10  -2   65.25    2.81
   1  10  -2   73.56    3.02
  -1  10   2   70.20    2.93
   1 -10  -1    0.39    0.30
   1  10  -1    0.49    0.29
  -1  10   1    0.06    0.26
   1  10  -1    0.17    0.25
   1  10  -1    0.62    0.36
  -1  10   1    0.79    0.34
   1  10   0   26.86    1.62
  -1  10   0   25.65    1.53
   1  10   0   27.71    1.62
  -1  10   0   29.16    1.68
   1  10   0   30.15    1.62
   1  10   1  154.37    5.33
  -1  10  -1  146.45    5.40
  -1  10  -2   20.25    1.26
   1  10   3    1.49    0.28
  -1  10  -3    1.33    0.30
  -1  10  -3    1.37    0.28
  -1 -10  -3    1.80    0.31
   1  11  -2    1.86    0.35
   1  11  -2    2.07    0.33
  -1  11   2    2.23    0.34
   1  11  -1    1.26    0.29
  -1  11   1    0.95    0.29
   1  11  -1    1.25    0.33
  -1  11   1    1.05    0.29
  -1  11   0    4.05    0.50
   1  11   0    3.50    0.44
   1  11   0    3.28    0.46
  -1  11   0    3.00    0.43
   1  11   0    3.42    0.45
  -1  11  -1    1.98    0.36
  -1  11  -1    2.53    0.40
  -1 -11  -2    1.43    0.27
  -1  11  -2    1.49    0.29
  -1  11  -2    0.78    0.21
   2   0  -7    0.05    0.21
   2   0  -6  103.68    4.26
   2   0  -6  108.69    4.25
   2   0  -5   -0.13    0.26
   2   0  -5   -0.05    0.30
   2   0  -5   -0.05    0.22
   2   0  -5    0.05    0.24
   2   0  -5   -0.05    0.25
   2   0  -4    4.24    0.71
   2   0  -4    4.46    0.64
   2   0  -4    4.16    0.64
   2   0  -3    0.06    0.22
   2   0  -3   -0.15    0.25
   2   0  -3    0.35    0.30
   2   0  -3   -0.05    0.21
   2   0  -3    0.10    0.21
   2   0  -3    0.09    0.20
   2   0  -2 9544.88  298.80
   2   0  -2 9729.63  298.75
   2   0  -2 9822.15  298.77
  -2   0   2 9999.00  298.75
   2   0  -2 9615.95  298.61
   2   0  -2 9187.47  298.74
   2   0  -2 9132.49  298.69
   2   0  -1   -0.02    0.14
   2   0  -1    0.16    0.17
   2   0  -1   -0.05    0.15
  -2   0   1   -0.07    0.15
  -2   0   0    1.66    0.30
   2   0   0    1.89    0.31
   2   0   0    2.32    0.30
  -2   0  -1    0.04    0.18
  -2   0  -2  556.02   18.59
  -2   0  -3   -0.11    0.24
  -2   0  -4   47.73    2.29
  -2   0  -5   -0.06    0.25
  -2   0  -5    0.24    0.25
  -2   0  -6  119.53    4.39
   2  -1  -7    4.54    0.58
   2   1  -7    5.40    0.60
   2   1  -6   18.50    1.24
   2   1  -6   16.82    1.24
   2  -1  -6   16.67    1.22
   2   1  -5   14.12    1.05
   2  -1  -5   14.80    1.06
   2   1  -5   16.42    1.11
   2  -1  -5   15.60    1.10
   2  -1  -5   15.59    1.41
   2   1  -5   13.82    1.34
   2   1  -5   12.65    1.46
   2   1  -5   16.26    1.12
   2  -1  -5   12.38    1.45
   2   1  -4  118.42    4.81
   2  -1  -4  117.25    5.09
   2  -1  -4  119.63    4.88
   2  -1  -4  124.75    4.86
   2  -1  -4  121.50    5.08
   2   1  -4  127.33    5.19
   2  -1  -3   14.28    0.96
   2  -1  -3   14.00    1.09
   2   1  -3   14.45    1.00
   2  -1  -3   12.61    1.00
   2   1  -3   12.66    0.91
   2   1  -3   15.29    1.13
   2   1  -3   14.32    1.00
   2  -1  -3   10.47    0.98
   2  -1  -3   15.15    1.01
   2  -1  -2  471.12   15.49
   2   1  -2  462.90   15.52
   2  -1  -2  504.19   15.64
   2   1  -2  498.79   15.71
   2  -1  -2  491.08   15.64
   2   1  -2  479.47   15.63
   2   1  -2  497.83   15.66
  -2   1   2  476.34   15.73
   2   1  -1   73.33    2.53
   2  -1  -1   70.82    2.64
   2  -1  -1   66.15    2.47
   2   1  -1   68.70    2.68
  -2  -1   1   73.87    2.67
   2   1  -1   69.66    2.54
   2   1   0  711.18   22.15
  -2  -1   0  674.53   22.24
   2  -1   0  689.48   22.11
  -2  -1  -1    3.54    0.48
   2  -1   1    3.77    0.46
  -2  -1  -2  346.08   11.90
  -2   1  -2  339.70   11.88
  -2   1  -3    0.53    0.32
  -2  -1  -3    0.32    0.26
  -2   1  -4   63.45    2.83
  -2   1  -4   60.92    2.76
  -2  -1  -4   67.44    2.84
  -2   1  -4   57.15    2.72
  -2  -1  -4   65.98    2.87
  -2  -1  -5   82.60    3.55
  -2   1  -5   87.29    3.56
  -2   1  -5   84.31    3.56
  -2  -1  -5   93.24    3.66
  -2  -1  -6   35.65    1.64
  -2   1  -6   34.98    1.62
  -2  -1  -6   33.30    1.62
  -2   1  -6   35.09    1.66
   2   2  -7   28.39    1.55
   2  -2  -7   31.62    1.61
   2   2  -6   -0.06    0.24
   2  -2  -6    0.25    0.31
   2   2  -6   -0.37    0.45
   2   2  -5   28.07    1.58
   2  -2  -5   26.12    1.94
   2   2  -5   29.70    1.63
   2   2  -5   29.19    2.05
   2  -2  -4   72.39    3.22
   2  -2  -4   66.32    3.37
   2  -2  -4   65.26    3.20
   2   2  -4   72.77    3.28
   2   2  -3  712.36   23.03
   2   2  -3  706.66   23.06
   2  -2  -3  714.45   23.02
  -2   2   2    2.27    0.42
   2   2  -2    2.39    0.41
   2   2  -2    1.69    0.31
   2   2  -2    2.30    0.35
   2  -2  -2    1.73    0.30
   2   2  -2    1.70    0.37
  -2   2   1   61.99    2.50
   2   2  -1   61.60    2.26
   2  -2  -1   60.71    2.36
   2   2   0  135.62    4.58
   2   2   0  123.25    4.53
   2  -2   0  118.04    4.45
  -2  -2   0  129.92    4.64
  -2  -2  -1   18.82    1.20
  -2  -2  -1   18.09    1.15
  -2   2  -1   17.69    1.13
  -2   2  -2   46.30    2.27
  -2  -2  -2   44.99    2.38
  -2   2  -2   45.99    2.39
  -2  -2  -3  104.63    3.75
  -2  -2  -3   89.33    3.70
  -2   2  -3   95.90    4.44
  -2   2  -3   93.02    3.70
  -2   2  -4  107.83    4.30
  -2   2  -4  106.29    4.32
  -2  -2  -4  108.51    4.33
  -2  -2  -4  111.94    4.32
  -2   2  -5   98.69    3.88
  -2   2  -5   92.34    3.85
  -2  -2  -5   95.98    3.88
  -2  -2  -5  101.35    3.91
  -2   2  -5   89.52    3.81
  -2  -2  -6   -0.04    0.18
  -2   2  -6    0.11    0.20
  -2   2  -6    0.14    0.19
  -2   2  -6    0.04    0.19
  -2  -2  -6    0.26    0.21
   2  -3  -7   17.05    1.08
   2   3  -7   15.83    1.07
   2   3  -7   16.87    1.08
   2   3  -6   15.50    1.16
   2   3  -6   12.90    1.11
   2  -3  -6   16.39    1.17
   2  -3  -6   14.28    1.12
   2   3  -6   13.72    1.12
   2   3  -6   14.18    1.12
   2   3  -5    0.82    0.34
   2   3  -5    0.73    0.33
   2  -3  -5    1.85    0.43
   2   3  -5    0.89    0.31
   2  -3  -4   44.52    2.75
   2   3  -4   67.98    3.06
   2  -3  -4   54.35    3.05
   2  -3  -4   73.13    3.10
   2  -3  -3    0.40    0.25
   2   3  -3    0.31    0.28
   2   3  -2   21.24    1.36
   2   3  -2   23.29    1.32
   2   3  -2   24.19    1.43
  -2  -3   1   19.13    1.14
   2   3  -1   15.38    0.94
  -2   3   1   17.71    1.13
   2  -3  -1   16.87    1.04
   2   3  -1   14.87    1.04
  -2  -3   0  149.60    5.87
   2   3   0  169.77    5.81
   2   3   0  162.77    5.80
   2  -3   0  171.00    5.75
   2  -3   0  155.92    5.80
  -2  -3  -1  329.85   11.32
  -2   3  -2  121.01    4.87
  -2  -3  -3   26.96    1.47
  -2   3  -3   26.17    1.47
  -2   3  -3   25.55    1.47
  -2  -3  -3   22.81    1.40
  -2  -3  -3   26.06    1.95
  -2  -3  -4   39.88    2.09
  -2   3  -4   42.89    2.12
  -2   3  -4   42.41    2.14
   2   3   4   37.10    2.07
  -2  -3  -5    7.87    0.79
  -2   3  -5    8.21    0.80
  -2  -3  -5    7.81    0.78
  -2   3  -5    7.98    0.79
  -2  -3  -6   13.39    0.83
  -2  -3  -6   13.58    0.83
  -2   3  -6   12.85    0.82
   2  -4  -7   18.89    1.10
   2  -4  -7   20.41    1.13
   2  -4  -7   20.43    1.16
   2   4  -7   19.77    1.15
   2  -4  -6    2.24    0.47
   2   4  -6    1.03    0.40
   2   4  -6    2.84    0.50
   2  -4  -6    1.91    0.45
   2   4  -6    1.76    0.50
   2   4  -6    2.51    0.51
   2   4  -5   22.60    1.41
   2   4  -5   18.92    1.26
   2   4  -5   21.26    1.37
   2   4  -5   17.62    1.28
   2   4  -5   19.21    1.31
   2  -4  -5   17.93    1.27
   2   4  -5   19.39    1.33
   2  -4  -4   24.03    1.40
   2   4  -4   26.82    1.43
   2   4  -4   23.15    1.40
   2   4  -4   24.57    1.42
   2   4  -4   25.65    1.45
   2   4  -4   26.40    1.47
   2   4  -3   13.07    1.23
   2   4  -2  119.23    4.67
   2   4  -2  122.44    4.84
   2  -4  -1    0.79    0.29
  -2  -4   1    0.50    0.28
   2   4  -1    0.88    0.28
   2   4  -1    1.24    0.37
  -2  -4   0  295.72   10.43
   2   4   0  312.97   10.28
   2  -4   0  288.09   10.30
   2   4   1   47.91    2.39
  -2   4  -1   44.89    2.30
  -2   4  -2   27.82    1.83
  -2  -4  -3   -0.16    0.25
  -2   4  -3    0.11    0.24
  -2   4  -3    0.20    0.25
  -2   4  -3    0.06    0.23
  -2  -4  -4   61.23    2.77
  -2   4  -4   58.60    2.75
  -2   4  -4   64.03    2.83
   2   4   4   59.21    2.83
  -2   4  -5    5.25    0.66
   2   4   5    5.37    0.65
  -2  -4  -5    6.90    0.71
  -2  -4  -5    6.77    0.68
  -2  -4  -6    0.70    0.19
  -2   4  -6    0.48    0.19
  -2  -4  -6    0.79    0.22
   2  -5  -7   40.94    1.80
   2   5  -7   44.52    1.85
  -2   5   6    7.73    0.82
   2  -5  -6    9.27    0.83
   2   5  -6    6.29    0.74
   2  -5  -6    7.52    0.74
   2   5  -6    7.79    0.77
   2   5  -6    8.21    0.82
   2   5  -6    7.48    0.79
   2   5  -5   69.18    3.16
   2   5  -5   70.11    3.15
   2   5  -5   72.42    3.12
   2   5  -5   79.29    3.26
   2   5  -5   73.91    3.15
   2   5  -5   70.89    3.14
   2  -5  -5   71.45    3.17
   2   5  -5   74.02    3.21
   2   5  -4   42.42    2.13
   2   5  -4   42.56    2.09
   2   5  -4   42.66    2.11
   2   5  -4   44.99    2.16
   2  -5  -4   43.28    2.10
   2   5  -4   42.22    2.12
   2   5  -4   43.88    2.15
   2   5  -4   44.19    2.07
   2   5  -3   57.36    3.17
  -2   5   3   62.38    3.24
   2   5  -2    1.34    0.45
   2   5  -2    0.95    0.32
   2   5  -1  313.58   11.02
  -2  -5   1  323.66   11.34
   2  -5  -1  325.87   11.20
  -2  -5   0   30.04    1.92
   2  -5   0   27.04    1.77
   2  -5   1   28.45    1.86
  -2  -5  -1   30.54    1.92
  -2   5  -1   26.30    1.73
   2   5   2    2.23    0.41
   2   5   2    1.84    0.52
  -2   5  -2    1.31    0.40
  -2   5  -2    2.48    0.57
  -2  -5  -2    2.04    0.55
  -2  -5  -3  395.27   13.01
  -2   5  -3  391.42   13.15
  -2   5  -3  373.87   13.03
  -2  -5  -4   44.03    2.24
  -2   5  -4   48.01    2.37
  -2   5  -4   46.65    2.30
   2   5   4   52.28    2.45
  -2  -5  -5   26.00    1.41
  -2   5  -5   25.80    1.41
   2   5   5   23.83    1.39
  -2   6   6    1.29    0.35
   2  -6  -6    1.35    0.36
   2   6  -6    1.11    0.30
   2   6  -6    1.81    0.39
   2   6  -6    1.18    0.33
  -2   6   5   17.51    1.31
   2   6  -5   20.33    1.33
   2   6  -5   18.25    1.26
   2  -6  -5   18.47    1.29
   2   6  -5   22.92    1.44
   2  -6  -5   19.20    1.32
   2   6  -5   19.31    1.33
   2   6  -5   19.31    1.33
   2   6  -4    0.24    0.30
   2   6  -4    0.06    0.25
   2   6  -4    0.06    0.26
   2   6  -4    0.56    0.43
   2   6  -4   -0.11    0.26
   2   6  -4    0.06    0.28
   2  -6  -4    0.12    0.27
   2  -6  -3   49.70    2.26
  -2   6   3   42.94    2.21
   2   6  -3   49.70    2.27
   2   6  -3   48.47    2.20
   2   6  -3   44.45    2.20
   2   6  -3   47.57    2.24
  -2   6   2   16.40    1.54
   2  -6  -2   20.10    1.25
   2   6  -2   20.72    1.58
  -2   6   2   21.74    1.31
   2   6  -2   21.11    1.25
   2   6  -2   18.25    1.62
  -2  -6   1   16.34    1.46
  -2   6   1   17.03    1.46
   2  -6  -1   14.73    1.34
  -2  -6   0   67.77    3.49
   2  -6   0   64.60    3.34
  -2   6   0   68.06    3.42
  -2   6  -1    2.77    0.49
   2   6   1    3.41    0.51
  -2   6  -1    3.55    0.52
   2   6   1    3.45    0.53
   2  -6   1    2.68    0.62
  -2   6  -2   68.19    3.09
   2   6   2   70.63    3.06
  -2   6  -3  132.29    5.07
   2   6   3  130.45    4.97
  -2  -6  -3  117.40    4.82
   2   6   3  128.68    4.98
  -2   6  -3  131.47    5.01
  -2  -6  -4   23.65    1.40
  -2   6  -4   21.86    1.44
   2   6   4   22.34    1.42
  -2   6  -5    1.79    0.33
  -2  -6  -5    2.32    0.36
   2   6   5    1.79    0.33
  -2   7   6   19.65    1.12
   2  -7  -6   19.62    1.09
   2   7  -6   18.26    1.05
  -2   7   5    3.32    0.54
   2   7  -5    4.17    0.57
   2   7  -5    3.63    0.55
   2   7  -5    3.26    0.53
   2  -7  -5    2.99    0.53
  -2   7   4   39.40    2.10
   2   7  -4   40.10    2.04
   2   7  -4   37.48    1.98
   2   7  -4   39.45    2.05
   2   7  -4   38.82    2.07
   2  -7  -4   42.67    2.10
  -2   7   3   30.13    1.75
   2  -7  -3   32.47    1.75
   2  -7  -2    4.85    0.65
  -2   7   2    3.93    0.61
   2   7  -2    4.55    0.62
   2   7  -2    5.16    0.67
  -2  -7   1   15.19    1.53
   2  -7  -1   12.52    1.02
   2   7  -1   14.23    1.09
  -2   7   1   14.86    1.10
  -2   7   1   12.74    1.04
   2   7  -1   13.16    1.06
  -2   7   1   10.86    1.30
   2   7   0  168.47    6.21
  -2   7   0  184.19    6.39
  -2  -7   0  166.65    7.19
   2   7   0  168.14    6.34
   2   7   0  190.38    6.44
   2   7   1   35.54    1.86
  -2   7  -1   33.47    1.86
  -2   7  -1   30.70    1.83
   2   7   1   36.50    1.93
  -2   7  -1   31.24    1.78
   2   7   2    9.70    0.90
  -2   7  -2   10.55    1.01
  -2   7  -2   10.83    0.99
   2   7   3    6.92    0.79
  -2   7  -3    7.05    0.80
  -2  -7  -3    7.67    0.81
  -2   7  -3    7.21    0.81
  -2   7  -4   31.53    1.64
   2   7   4   27.79    1.53
   2   8  -5    0.56    0.29
   2  -8  -5    0.45    0.22
  -2   8   5    0.91    0.31
   2   8  -5    0.80    0.30
   2  -8  -5    0.27    0.24
  -2   8   4  192.35    7.24
   2   8  -4  205.28    7.25
   2   8  -4  205.96    7.23
   2   8  -4  205.15    7.21
   2  -8  -4  208.53    7.30
   2  -8  -3   86.15    3.62
  -2   8   3   84.09    3.63
   2   8  -3   85.69    3.55
   2  -8  -2   12.80    1.06
   2   8  -2   13.06    1.11
   2  -8  -1   30.02    1.78
   2   8  -1   30.24    1.81
  -2   8   1   32.71    1.82
   2   8  -1   30.53    1.81
   2   8  -1   30.36    1.72
  -2   8   1   31.08    1.86
  -2   8   0  277.53    8.97
   2   8   0  251.71    8.92
   2   8   1   13.57    1.07
  -2   8  -1   10.43    0.99
  -2   8  -1   13.28    1.11
   2   8   1   12.20    1.06
   2   8   2   10.44    0.94
   2   8   2    8.40    0.83
  -2   8  -2   10.46    1.00
  -2   8  -2   10.97    0.97
   2   8   3   10.00    0.87
  -2   8  -3   11.62    0.98
  -2  -8  -3   12.30    0.96
  -2   8  -3   12.80    1.01
   2   8   3   11.82    0.95
   2   8   4   37.58    1.69
  -2   8  -4   37.00    1.73
  -2   9   5    8.69    0.62
   2   9  -5   10.42    0.67
   2  -9  -5    9.09    0.63
   2   9  -5    9.42    0.64
   2  -9  -5    7.72    0.62
   2   9  -4   -0.04    0.25
   2   9  -4    0.04    0.20
   2  -9  -4    0.09    0.23
  -2   9   3    0.61    0.35
   2  -9  -3    0.72    0.34
   2   9  -3    0.20    0.26
   2   9  -3    0.22    0.26
   2  -9  -2   17.32    1.26
   2   9  -2   17.35    1.22
  -2   9   2   16.33    1.24
   2   9  -2   17.69    1.29
   2  -9  -1   38.94    2.14
   2   9  -1   43.00    2.23
  -2   9   1   45.55    2.22
  -2   9   1   40.49    2.21
   2   9  -1   42.92    2.15
   2   9  -1   41.32    2.22
  -2   9   1   44.69    2.16
   2  -9   0   34.47    1.95
   2   9   0   35.22    2.00
  -2   9  -1   26.25    1.67
   2   9   1   28.83    1.68
  -2   9  -1   29.09    1.69
   2   9   1   30.23    1.63
   2   9   2   82.72    3.28
  -2   9  -2   76.47    3.30
  -2   9  -2   77.14    3.26
   2   9   3    3.93    0.47
  -2   9  -3    4.07    0.51
   2   9   3    3.90    0.46
  -2  -9  -3    4.07    0.48
   2  10  -4    0.93    0.23
   2 -10  -4    0.87    0.23
   2  10  -4    0.66    0.22
   2 -10  -4    0.53    0.21
   2  10  -3    5.53    0.57
   2 -10  -3    5.64    0.57
   2  10  -2  129.99    4.93
  -2  10   2  133.95    4.98
   2  10  -2  131.17    5.04
   2 -10  -2  146.14    5.08
   2  10  -2  132.81    4.92
  -2  10   1   70.50    3.04
   2 -10  -1   75.67    3.05
   2  10  -1   68.22    2.94
   2  10  -1   65.99    3.00
  -2  10   0    4.96    0.65
   2 -10   0    6.67    0.70
   2  10   0    5.45    0.62
   2  10   0    6.79    0.74
  -2  10  -1   49.99    2.30
   2  10   2    0.45    0.21
  -2  10  -2    0.59    0.26
  -2 -10  -2    0.42    0.23
   2  11  -2    5.21    0.49
   2  11  -2    5.44    0.53
   2  11  -2    6.08    0.50
  -2  11   2    4.71    0.48
   2  11  -1    4.82    0.52
   2 -11  -1    3.75    0.45
   2  11  -1    4.10    0.46
  -2  11   1    3.41    0.44
   2  11   0    1.25    0.30
  -2  11   0    0.85    0.30
  -2  11  -1    2.23    0.34
  -2 -11  -1    2.38    0.33
   3   0  -8   50.46    2.02
   3   0  -8   49.18    2.01
   3   0  -7   -0.06    0.24
   3   0  -6   14.63    1.14
   3   0  -6   13.85    1.13
   3   0  -5    0.27    0.26
   3   0  -5   -0.11    0.27
   3   0  -5    0.27    0.28
   3   0  -5    0.05    0.25
   3   0  -5   -0.05    0.23
   3   0  -4 2051.67   65.98
   3   0  -4 2095.11   65.86
   3   0  -3    0.27    0.26
   3   0  -3    0.05    0.24
   3   0  -3    0.12    0.24
   3   0  -3   -0.11    0.22
   3   0  -2  389.41   12.95
   3   0  -2  396.64   12.98
   3   0  -2  396.02   13.02
   3   0  -1    0.16    0.21
  -3   0   1    0.04    0.20
  -3   0   0  238.04    7.91
   3   0   0  214.43    7.79
  -3   0  -1   -0.06    0.25
  -3   0  -2  493.56   16.98
  -3   0  -3    0.11    0.26
  -3   0  -4  199.71    7.23
  -3   0  -5   -0.05    0.25
   3  -1  -8    3.09    0.36
   3   1  -8    2.21    0.33
   3  -1  -8    2.70    0.32
   3   1  -8    2.29    0.33
   3  -1  -7    0.80    0.33
   3   1  -7    0.97    0.35
   3  -1  -7    1.34    0.35
   3   1  -7    0.05    0.38
   3   1  -6   31.11    1.80
   3   1  -6   35.09    1.87
   3   1  -6   33.51    1.87
   3  -1  -6   32.48    1.83
   3  -1  -6   31.39    1.77
   3  -1  -5   11.82    0.94
   3   1  -5   10.63    0.91
   3  -1  -5   10.66    0.91
   3  -1  -5   11.59    0.91
   3  -1  -5   14.31    1.37
   3   1  -5   11.92    0.94
   3   1  -5   10.52    0.91
   3   1  -5   10.33    0.90
   3  -1  -5   11.77    0.92
   3  -1  -5   10.53    0.89
   3   1  -5   11.40    0.93
   3   1  -4  107.71    4.32
   3  -1  -4   93.58    4.19
   3  -1  -4   95.82    4.31
   3  -1  -3   42.26    2.05
   3   1  -3   39.53    2.03
   3  -1  -3   43.91    2.15
   3  -1  -3   37.48    2.05
   3  -1  -3   39.74    1.99
   3   1  -3   42.02    2.03
   3  -1  -2   42.17    1.86
   3   1  -2   39.68    1.83
   3  -1  -2   40.94    1.85
   3   1  -2   38.87    1.87
   3   1  -1  317.47   10.81
   3  -1  -1  309.18   10.72
   3   1  -1  323.72   10.64
  -3  -1   1  331.96   10.77
   3  -1   0  299.88   10.28
  -3  -1   0  290.65   10.33
   3   1   0  323.32   10.34
  -3  -1  -1  112.60    4.58
   3   1   1  117.74    4.58
   3  -1   1  116.83    4.52
  -3  -1  -2    1.81    0.50
  -3   1  -2    1.49    0.46
  -3   1  -3  126.65    4.75
  -3  -1  -3  120.14    4.73
  -3   1  -4   74.89    3.27
  -3  -1  -4   79.54    3.34
  -3   1  -4   76.05    3.32
  -3  -1  -5   15.92    1.08
  -3   1  -5   15.71    1.05
  -3   1  -5   14.95    1.05
   3   2  -7   11.72    0.94
   3  -2  -7   10.51    0.92
   3  -2  -7   10.11    0.87
   3   2  -7   11.10    0.93
   3   2  -6    4.00    0.59
   3  -2  -6    3.83    0.60
   3   2  -6    3.30    0.57
   3   2  -6    3.34    0.56
   3  -2  -6    2.91    0.51
   3  -2  -5    8.63    0.80
   3   2  -5    8.27    0.78
   3  -2  -5    8.00    0.79
   3   2  -5    8.25    0.81
   3   2  -5    8.10    0.80
   3  -2  -5    6.99    1.02
   3   2  -5    8.60    0.80
   3   2  -4   15.06    1.27
   3  -2  -4   16.01    1.39
   3  -2  -4   14.91    1.30
   3   2  -3  929.52   28.91
   3   2  -3  922.62   28.80
   3  -2  -3  837.43   28.64
   3   2  -3  888.17   28.72
  -3   2   2    5.97    0.72
   3   2  -2    6.63    0.70
   3   2  -2    5.52    0.58
   3  -2  -2    7.07    0.65
   3  -2  -2    5.84    0.64
   3   2  -1  101.98    4.12
   3  -2  -1  105.45    4.07
  -3  -2   1  110.66    4.16
   3   2   0   11.49    0.92
   3   2   0    9.46    0.87
   3  -2   0   10.17    0.84
  -3  -2   0   11.04    0.95
  -3   2  -1   60.33    2.96
   3   2   1   67.92    3.05
  -3  -2  -1   65.50    3.02
  -3   2  -2   43.74    2.57
  -3  -2  -3    0.06    0.24
  -3   2  -3    0.17    0.23
  -3   2  -3    0.22    0.26
   3   2   3    0.18    0.21
  -3  -2  -4   12.27    1.02
  -3   2  -4   11.65    0.99
  -3   2  -4   13.49    1.08
  -3   2  -4   13.24    1.03
  -3  -2  -5   34.92    1.71
  -3   2  -5   32.24    1.68
   3  -3  -7   19.09    1.17
   3   3  -7   18.84    1.18
   3   3  -7   16.61    1.15
   3   3  -7   16.39    1.14
   3  -3  -6   35.02    1.87
   3  -3  -6   32.31    1.85
   3   3  -6   32.93    1.88
   3   3  -6   35.48    1.90
   3   3  -6   35.27    1.88
   3   3  -5    0.29    0.31
   3   3  -5    0.49    0.30
   3  -3  -5    0.06    0.27
   3   3  -5    0.57    0.30
   3  -3  -5    0.58    0.31
   3  -3  -4   15.59    1.46
   3  -3  -4   13.00    1.32
   3   3  -3  165.59    6.33
   3   3  -3  178.92    6.59
   3  -3  -2   28.45    1.66
  -3   3   2   26.18    1.69
   3   3  -2   28.54    1.69
  -3   3   1    0.07    0.22
   3   3  -1    0.58    0.30
  -3  -3   1    1.06    0.33
   3  -3  -1    0.76    0.33
   3   3   0    8.38    0.85
   3  -3   0    7.44    0.77
  -3  -3   0    9.27    0.93
   3   3   1  270.12    9.53
  -3  -3  -1  256.02    9.51
   3   3   2  253.73    9.07
  -3   3  -2  231.35    8.09
  -3   3  -2  231.37    8.70
  -3   3  -2  233.36    8.10
   3   3   2  232.45    8.19
  -3  -3  -2  234.64    8.18
  -3   3  -3   33.40    1.80
  -3   3  -3   34.97    1.87
   3   3   3   32.63    1.85
  -3  -3  -4   -0.06    0.23
  -3  -3  -4   -0.06    0.28
  -3   3  -4    0.18    0.28
  -3   3  -4   -0.06    0.31
   3   3   4   -0.13    0.24
  -3  -3  -5    3.69    0.48
  -3   3  -5    3.25    0.49
   3  -4  -7    4.30    0.51
   3   4  -7    4.32    0.55
   3   4  -7    4.42    0.54
   3  -4  -7    4.19    0.50
   3   4  -7    3.64    0.52
   3  -4  -6    6.22    0.72
   3   4  -6    6.70    0.72
   3   4  -6    5.31    0.72
   3   4  -6    6.96    0.77
   3   4  -6    4.24    0.67
   3   4  -5   26.70    1.57
   3  -4  -5   28.55    1.59
   3   4  -5   28.27    1.62
   3   4  -5   27.20    1.59
   3   4  -5   25.90    1.54
   3   4  -5   23.44    1.46
   3  -4  -5   26.27    1.57
   3   4  -5   26.59    1.56
   3   4  -4   14.27    1.02
   3  -4  -4   11.95    0.97
   3   4  -4   12.32    0.97
   3   4  -4   14.00    1.02
   3   4  -4   12.50    0.98
   3   4  -4   15.04    1.04
   3   4  -4   14.44    1.02
   3   4  -4   13.39    0.97
   3   4  -3    1.39    0.44
   3  -4  -2  150.91    6.02
   3   4  -2  164.26    6.19
  -3   4   1  267.09    9.44
   3   4  -1  252.76    9.35
   3  -4  -1  269.44    9.34
   3   4   0  142.98    5.80
  -3  -4   0  158.52    6.07
   3   4   1   99.01    4.30
  -3   4  -1   93.67    4.15
  -3  -4  -1   93.11    4.32
   3   4   2   82.94    3.96
  -3   4  -2   70.31    3.63
   3   4   2   73.13    3.18
  -3  -4  -2   76.48    3.22
  -3   4  -3  157.56    5.76
   3   4   3  148.82    5.81
  -3  -4  -4   10.74    0.92
  -3   4  -4   11.18    0.94
   3   4   4   11.44    0.97
  -3  -4  -5    1.55    0.29
  -3   4  -5    1.19    0.30
  -3  -4  -5    0.93    0.25
  -3   5   7    1.86    0.33
   3  -5  -7    2.08    0.35
   3  -5  -7    1.49    0.30
   3  -5  -7    2.09    0.34
   3  -5  -6   10.84    0.94
   3   5  -6    8.24    0.86
   3   5  -6    9.63    0.86
   3   5  -6   10.04    0.89
   3   5  -6    9.24    0.86
   3   5  -5   77.99    3.40
   3   5  -5   76.43    3.35
   3   5  -5   78.57    3.40
   3   5  -5   80.55    3.41
   3   5  -5   77.00    3.31
   3  -5  -5   80.70    3.40
   3   5  -5   83.99    3.44
   3   5  -5   82.47    3.41
   3   5  -4   34.61    1.80
   3   5  -4   32.16    1.78
   3   5  -4   33.30    1.80
   3   5  -4   35.84    1.85
   3   5  -4   33.76    1.83
   3   5  -4   34.41    1.80
   3  -5  -4   34.51    1.82
   3   5  -4   35.10    1.84
   3   5  -3    1.92    0.38
  -3   5   3    2.55    0.45
   3   5  -3    1.96    0.39
   3  -5  -3    1.84    0.39
   3   5  -2   18.28    1.46
   3  -5  -2   13.34    1.29
   3  -5  -1  330.61   11.69
   3  -5  -1  334.60   11.80
   3   5   0    3.53    0.65
  -3  -5   0    1.61    0.51
   3   5   1  102.74    4.02
  -3   5  -1  100.36    4.08
   3   5   1  115.63    4.79
   3   5   1   96.38    4.05
  -3  -5  -1  105.96    4.86
  -3   5  -1  106.03    4.58
  -3   5  -2   11.18    1.00
   3   5   2   11.07    0.96
  -3  -5  -2   10.96    0.99
  -3   5  -3  106.02    4.45
   3   5   3  114.65    4.48
  -3   5  -4   40.15    2.07
  -3  -5  -4   44.92    2.06
  -3   5  -4   42.06    2.02
   3   5   4   40.25    2.06
  -3   5  -5   44.59    1.87
  -3  -5  -5   46.32    1.88
   3  -6  -7    0.03    0.13
  -3   6   6   14.96    1.11
   3  -6  -6   15.77    1.09
   3   6  -6   15.99    1.05
   3   6  -5   36.84    1.95
   3   6  -5   38.85    2.03
   3   6  -5   39.27    1.99
   3   6  -5   37.96    1.93
   3  -6  -5   36.09    1.95
   3   6  -4   12.78    1.03
   3   6  -4   14.34    1.17
   3   6  -4   11.30    1.00
   3   6  -4   11.28    0.99
   3  -6  -4   13.45    1.05
   3   6  -3  125.75    4.87
   3   6  -3  128.18    4.87
   3   6  -3  123.45    4.86
   3  -6  -2    0.38    0.24
   3   6  -2    0.99    0.33
  -3   6   2    0.60    0.30
   3  -6  -2    0.32    0.28
  -3   6   1    0.17    0.24
   3   6  -1    0.31    0.24
   3  -6  -1    0.35    0.24
   3  -6  -1    0.53    0.37
   3   6  -1    0.26    0.21
  -3   6   1    0.28    0.27
   3   6  -1    0.69    0.29
  -3   6   0    0.06    0.27
   3   6   0   -0.11    0.21
   3   6   0    0.06    0.25
   3   6   0    0.44    0.26
  -3  -6   0    0.25    0.34
   3   6   1   11.94    0.96
  -3   6  -1   10.10    0.97
   3   6   1    9.31    0.93
  -3   6  -1   10.02    0.94
  -3   6  -2    4.93    0.69
   3   6   2    4.70    0.64
  -3   6  -2    3.49    0.62
  -3  -6  -2    4.72    0.66
  -3   6  -3  125.82    4.81
   3   6   3  116.70    4.66
  -3  -6  -3  119.69    4.68
  -3   6  -3  118.09    4.66
  -3   6  -4    0.49    0.29
  -3  -6  -4    0.63    0.27
   3   6   4    0.76    0.29
  -3   7   6    0.60    0.26
   3  -7  -6    0.76    0.26
   3   7  -6    0.95    0.27
  -3   7   5   11.64    1.00
   3   7  -5   13.87    1.01
   3   7  -5   13.49    1.02
   3   7  -5   11.92    0.93
   3  -7  -5   12.71    1.00
   3   7  -4    4.17    0.60
   3   7  -4    5.32    0.66
   3   7  -4    4.42    0.62
   3  -7  -4    3.56    0.58
   3  -7  -3   24.02    1.56
   3   7  -3   28.90    1.64
  -3   7   3   29.53    1.71
   3   7  -3   27.31    1.60
   3  -7  -2  208.20    7.63
   3   7  -2  213.36    7.62
  -3   7   2  217.48    7.73
  -3   7   1   15.04    1.16
   3   7  -1   15.25    1.12
  -3   7   1   15.13    1.16
   3   7  -1   14.62    1.09
   3   7  -1   14.73    1.16
   3   7  -1   12.50    1.03
  -3   7   0   10.10    1.00
   3   7   0   13.42    1.10
   3   7   0   11.28    0.96
   3   7   0   12.30    1.01
   3   7   1  103.42    4.22
  -3   7  -1  105.91    4.31
   3   7   1  100.13    4.18
   3   7   1  110.21    4.36
   3   7   2   62.41    2.77
  -3   7  -2   59.71    2.79
  -3   7  -2   59.60    2.82
   3   7   2   59.51    2.78
  -3  -7  -2   56.74    2.77
  -3   7  -2   62.84    2.84
   3   7   3    5.19    0.65
  -3   7  -3    5.14    0.67
  -3  -7  -3    5.23    0.62
  -3   7  -3    6.47    0.72
   3   7   4   -0.03    0.16
  -3   7  -4    0.27    0.21
  -3  -7  -4    0.03    0.16
   3   7   4   -0.03    0.16
   3   8  -5    0.43    0.25
   3   8  -5    0.75    0.28
   3   8  -5    0.33    0.22
   3  -8  -5    0.09    0.23
   3   8  -4    0.05    0.27
   3   8  -4   -0.05    0.28
   3   8  -4    0.27    0.29
   3  -8  -4    0.06    0.27
   3  -8  -3   99.10    4.04
   3   8  -3   97.45    3.97
  -3   8   3  100.59    4.12
   3   8  -3   99.87    3.99
   3  -8  -2   97.05    4.13
   3   8  -2  105.55    4.17
   3   8  -2  106.04    4.25
  -3   8   2  100.60    4.22
  -3   8   1    0.63    0.38
   3  -8  -1    0.74    0.35
   3   8  -1    0.32    0.26
   3   8  -1    1.42    0.46
  -3   8   0  121.40    4.62
   3   8   0  105.71    4.39
   3   8   0  113.04    4.57
   3   8   0  109.49    4.43
  -3   8  -1   36.26    1.96
   3   8   1   32.38    1.83
  -3   8  -1   33.44    1.87
   3   8   1   36.02    1.90
   3   8   2   73.63    3.07
   3   8   2   76.68    3.11
  -3   8  -2   68.65    3.08
  -3  -8  -2   66.94    3.07
  -3   8  -2   72.51    3.10
   3   8   3    2.20    0.37
   3   8   3    1.66    0.33
  -3   8  -3    2.06    0.40
  -3  -8  -3    1.04    0.30
  -3   8  -3    1.75    0.36
   3   9  -5   -0.06    0.17
   3  -9  -5   -0.16    0.18
   3   9  -4    0.09    0.24
   3  -9  -4    0.18    0.21
   3  -9  -3   22.62    1.38
   3   9  -3   20.46    1.29
  -3   9   3   22.96    1.42
   3   9  -3   21.77    1.31
   3  -9  -2    3.83    0.60
   3   9  -2    4.57    0.62
  -3   9   2    3.19    0.56
   3   9  -2    4.16    0.64
   3  -9  -1    2.87    0.55
   3   9  -1    2.18    0.47
  -3   9   1    2.99    0.55
   3   9  -1    2.74    0.56
   3  -9   0   19.20    1.29
  -3   9   0   17.15    1.28
   3   9   0   18.57    1.30
   3   9   0   16.35    1.15
  -3   9  -1   23.13    1.41
   3   9   1   20.16    1.28
  -3   9  -1   22.86    1.41
  -3  -9  -1   21.11    1.36
   3   9   1   24.23    1.38
  -3   9  -2   12.98    0.96
   3   9   2   13.44    0.92
  -3  -9  -2   13.34    0.95
  -3   9  -2   15.17    0.98
   3   9   2   14.86    0.96
  -3   9  -3    1.70    0.29
  -3  10   4   57.09    2.26
   3  10  -4   62.19    2.27
   3 -10  -4   56.03    2.25
   3  10  -3    1.13    0.27
   3  10  -3    1.78    0.33
   3 -10  -3    1.31    0.31
   3 -10  -2    9.21    0.79
   3  10  -2    8.66    0.74
  -3  10   2    7.95    0.74
   3  10  -2    9.35    0.82
   3 -10  -1  101.72    3.97
   3  10  -1  102.05    3.90
  -3  10   1  102.06    4.01
   3  10  -1  105.02    4.03
   3 -10   0   10.14    0.83
  -3  10   0   10.62    0.88
   3  10   1    0.74    0.24
   3 -10   1    1.31    0.32
  -3  10  -1    1.06    0.30
  -3 -10  -1    1.22    0.29
   3 -11  -2    1.39    0.27
   3  11  -2    1.42    0.25
   3 -11  -1   16.81    0.93
   3  11  -1   17.50    0.90
   4   0  -8   20.64    1.09
   4   0  -7   -0.06    0.30
   4   0  -6    8.52    0.88
   4   0  -6    9.11    0.87
   4   0  -6    7.33    0.84
   4   0  -6    9.11    0.89
   4   0  -6    8.17    0.84
   4   0  -5    0.23    0.28
   4   0  -5    0.17    0.32
   4   0  -5   -0.06    0.28
   4   0  -5    0.06    0.27
   4   0  -4 1347.53   44.13
   4   0  -4 1399.77   44.16
   4   0  -3    0.19    0.23
   4   0  -3    0.07    0.26
   4   0  -2   32.92    1.84
   4   0  -2   34.87    1.85
   4   0  -1   -0.07    0.24
   4   0  -1   -0.24    0.26
  -4   0   1    0.07    0.24
  -4   0   0  339.75   12.17
   4   0   0  360.26   12.09
  -4   0  -1   -0.09    0.28
  -4   0  -2   16.73    1.15
  -4   0  -3   -0.06    0.24
  -4   0  -4   61.57    2.66
  -4   0  -4   55.42    2.60
  -4   0  -5    0.10    0.16
  -4   0  -5   -0.03    0.15
   4   1  -8   -0.39    0.27
   4   1  -8    0.03    0.19
   4  -1  -8    0.03    0.16
   4   1  -8   -0.29    0.26
   4   1  -7    3.16    0.54
   4  -1  -7    2.71    0.50
   4  -1  -6   11.78    1.05
   4   1  -6   13.82    1.13
   4  -1  -6   12.32    1.06
   4   1  -6   13.54    1.09
   4   1  -6   13.15    1.10
   4  -1  -6   14.05    1.11
   4  -1  -6   16.07    1.17
   4   1  -6   13.65    1.10
   4   1  -5   19.41    1.25
   4  -1  -5   17.83    1.23
   4   1  -5   21.80    1.34
   4  -1  -5   19.08    1.25
   4   1  -5   21.38    1.31
   4   1  -5   18.83    1.24
   4   1  -5   18.46    1.22
   4   1  -5   18.48    1.25
   4  -1  -5   20.24    1.29
   4  -1  -5   17.99    1.23
   4   1  -5   16.86    1.20
   4   1  -4  230.66    8.54
   4  -1  -4  233.52    8.56
   4  -1  -4  227.38    8.50
   4   1  -4  234.89    8.54
   4   1  -3   64.01    2.97
   4   1  -3   65.30    2.98
   4  -1  -3   68.32    3.01
   4   1  -2   55.28    2.68
   4  -1  -2   55.17    2.61
   4   1  -2   52.53    2.55
   4  -1  -2   60.94    2.64
  -4  -1   1    7.91    0.83
   4   1  -1    5.83    0.76
   4  -1  -1    8.53    0.84
   4   1  -1    7.58    0.77
  -4  -1   0  262.81    9.56
   4   1   0  276.63    9.65
   4  -1   0  262.27    9.46
  -4  -1  -1    3.79    0.71
  -4   1  -1    4.88    0.78
  -4  -1  -1    4.89    0.76
  -4   1  -2   41.67    2.05
  -4  -1  -2   39.39    1.98
  -4   1  -2   39.58    2.00
   4   1   2   40.95    2.05
  -4  -1  -2   41.31    2.07
  -4   1  -3  142.92    5.53
  -4  -1  -3  148.98    5.54
  -4   1  -4   44.05    2.12
  -4  -1  -4   44.56    2.13
  -4   1  -4   41.09    2.10
  -4   1  -5   13.96    0.82
  -4  -1  -5   14.69    0.85
  -4   1  -5   14.28    0.84
   4  -1   5   14.53    0.86
   4   2  -8   -0.18    0.21
   4   2  -8    0.06    0.14
   4  -2  -8   -0.06    0.15
   4   2  -8   -0.25    0.25
   4   2  -7   20.89    1.26
   4   2  -7   18.15    1.22
   4  -2  -7   18.23    1.23
   4  -2  -7   16.50    1.13
   4   2  -7   18.33    1.22
   4   2  -6   47.01    2.29
   4  -2  -6   45.02    2.28
   4   2  -6   44.05    2.26
   4   2  -6   45.55    2.28
   4   2  -6   45.99    2.25
   4   2  -5  331.73   11.06
   4   2  -5  321.72   11.04
   4  -2  -5  319.20   11.02
   4   2  -5  326.13   11.03
   4   2  -5  314.39   10.97
   4   2  -5  326.08   11.05
   4  -2  -5  323.42   11.01
   4   2  -5  327.93   11.02
   4   2  -4   18.61    1.46
   4   2  -4   17.40    1.38
  -4   2   3   -0.09    0.25
   4   2  -3    0.16    0.26
   4   2  -3    0.29    0.27
   4   2  -3    0.07    0.20
  -4   2   2  141.26    5.66
   4  -2  -2  144.63    5.50
   4   2  -2  136.69    5.32
   4  -2  -2  139.48    5.33
   4   2  -2  146.70    5.62
   4   2  -1    9.58    0.99
  -4  -2   1   10.69    1.01
   4  -2  -1   12.60    1.06
   4   2   0   39.93    2.22
  -4  -2   0   38.59    2.23
   4   2   0   35.23    2.15
   4  -2   0   38.58    2.13
   4   2   1   94.60    4.12
  -4  -2  -1   90.48    4.10
  -4   2  -2  212.33    7.53
  -4   2  -2  208.86    7.52
   4   2   2  219.88    7.61
  -4  -2  -2  204.37    7.55
  -4   2  -3  124.03    4.84
  -4  -2  -3  126.71    4.82
   4   2   3  121.01    4.85
  -4  -2  -4    8.47    0.77
  -4   2  -4    7.30    0.75
   4  -2   4    8.40    0.80
  -4   2  -4    8.90    0.80
   4   2   5    0.14    0.78
  -4   2  -5    0.31    0.18
  -4  -2  -5    0.47    0.18
   4   3  -7    0.31    0.25
   4  -3  -7   -0.24    0.24
   4   3  -7   -0.45    0.43
   4   3  -6   17.64    1.23
   4  -3  -6   17.30    1.24
   4   3  -6   17.73    1.25
   4   3  -6   14.01    1.16
   4   3  -6   15.29    1.18
   4   3  -6   16.89    1.18
   4   3  -5   16.29    1.21
   4  -3  -5   19.12    1.30
   4   3  -5   18.35    1.27
   4   3  -5   17.48    1.23
   4   3  -5   19.95    1.27
   4  -3  -5   18.38    1.24
   4   3  -4    6.33    0.87
   4  -3  -4    7.08    0.70
   4   3  -4    6.29    0.67
   4   3  -4    7.19    0.70
   4   3  -4    7.47    0.70
   4  -3  -4    6.57    0.67
   4   3  -3    0.93    0.38
   4  -3  -3    0.68    0.35
   4   3  -3    0.64    0.32
  -4   3   3    1.02    0.43
  -4   3   2    7.54    0.96
   4   3  -2    8.71    0.99
   4  -3  -2    9.14    0.97
  -4   3   1  273.42    9.99
   4   3  -1  285.46   10.00
  -4  -3   1  281.86   10.02
   4  -3  -1  265.59    9.82
   4   3   0  168.15    6.50
  -4  -3   0  162.87    6.55
   4  -3   0  159.48    6.30
  -4   3  -1   53.36    2.64
   4   3   1   67.10    3.39
  -4   3  -1   65.27    2.76
  -4  -3  -1   59.39    3.29
   4   3   1   59.44    2.73
  -4  -3  -1   71.72    2.89
   4  -3   1   63.52    2.78
   4   3   2    0.57    1.29
  -4   3  -2    0.30    0.24
   4   3   2    0.32    0.24
  -4  -3  -2   -0.07    0.26
   4  -3   2   -0.06    0.24
  -4   3  -3   -0.06    0.26
   4   3   3    0.30    1.67
  -4   3  -3    0.06    0.26
   4   3   3   -0.07    0.25
   4   3   4   20.16    2.96
  -4   3  -4   37.72    1.79
   4  -4  -7   -0.04    0.21
   4   4  -7   -0.45    0.34
   4   4  -7    0.18    0.23
   4  -4  -7    0.21    0.23
   4   4  -7   -0.43    0.36
   4   4  -6    0.90    0.38
   4  -4  -6    0.66    0.35
   4   4  -6    0.30    0.38
   4   4  -6    1.11    0.38
   4   4  -6    0.87    0.34
   4   4  -6    0.06    0.43
   4   4  -5    5.12    0.70
   4   4  -5    6.15    0.71
   4   4  -5    6.14    0.71
   4   4  -5    5.27    0.67
   4  -4  -5    5.55    0.71
   4  -4  -5    5.96    0.74
   4   4  -4   27.01    1.39
   4   4  -4   27.31    1.44
   4   4  -4   25.90    1.39
   4   4  -4   26.73    1.39
   4   4  -3   21.89    1.28
  -4   4   3   19.30    1.27
   4   4  -3   19.42    1.54
   4   4  -3   21.75    1.75
   4  -4  -3   19.30    1.63
   4   4  -3   22.87    1.29
   4   4  -3   22.65    1.26
   4  -4  -3   20.12    1.25
   4   4  -3   21.83    1.28
   4   4  -3   21.03    1.24
  -4   4   2  170.45    6.66
   4   4  -2  163.27    6.49
   4  -4  -2  150.05    6.32
   4   4  -1    1.93    0.50
   4  -4  -1    1.78    0.50
  -4  -4   1    2.35    0.56
  -4   4   0   37.42    1.95
   4   4   0   39.32    2.44
  -4  -4   0   39.21    2.51
  -4  -4   0   39.08    1.96
   4  -4   0   36.50    1.90
   4   4   1   66.62    3.51
  -4  -4  -1   56.11    3.34
  -4   4  -1   57.65    3.24
  -4   4  -1   61.61    2.76
   4   4   1   66.11    2.83
  -4  -4  -1   67.15    2.91
   4  -4   1   59.93    2.77
  -4   4  -2   99.43    3.96
   4   4   2   97.68    4.01
  -4  -4  -2   98.50    4.04
  -4   4  -3    3.24    0.58
   4   4   3    1.12    1.63
   4   4   3    2.13    0.47
   4   4   4    0.41    1.16
  -4   4  -4    0.15    0.22
  -4   4  -4    0.40    0.22
  -4   5   7   23.11    1.30
   4  -5  -7   24.05    1.28
   4  -5  -7   24.15    1.27
   4  -5  -6   20.68    1.32
   4   5  -6   22.65    1.35
   4   5  -6   21.19    1.34
   4   5  -6   21.41    1.30
   4  -5  -5   26.82    1.58
   4   5  -5   22.90    1.49
   4   5  -5   25.16    1.53
   4   5  -5   24.53    1.52
   4   5  -5   25.86    1.54
   4  -5  -5   26.15    1.54
   4   5  -4    0.65    0.29
   4   5  -4    0.06    0.28
   4   5  -4    0.41    0.31
   4   5  -3  199.56    7.18
  -4   5   3  206.42    7.30
   4   5  -3  196.32    7.15
   4   5  -3  195.30    7.13
   4   5  -3  205.62    7.13
   4  -5  -3  209.83    7.23
   4  -5  -2    5.13    0.62
   4   5  -2    5.55    0.63
  -4   5   2    6.88    0.75
   4   5  -2    4.41    0.79
   4  -5  -2    5.06    0.83
   4  -5  -2    5.80    0.64
   4   5  -2    5.51    0.65
   4  -5  -1    8.75    0.80
   4   5  -1    7.18    0.72
  -4   5   1    6.89    0.74
  -4  -5   1    7.88    1.07
   4   5  -1    7.29    0.73
  -4   5   0    0.87    0.35
   4   5   0    1.29    0.50
   4   5   0    0.67    0.32
  -4  -5   0    1.39    0.55
  -4  -5   0    1.16    0.34
  -4   5  -1  268.16    9.75
   4   5   1  282.95    9.66
  -4  -5  -1  284.41    9.80
  -4   5  -2   62.60    2.86
   4   5   2   63.61    2.80
  -4  -5  -2   58.93    2.79
  -4   5  -3   44.13    2.12
   4   5   3   45.98    2.12
  -4   5  -4    0.94    0.29
  -4   6   6    0.42    0.25
   4  -6  -6    0.56    0.28
   4   6  -6    0.35    0.25
   4  -6  -5   24.71    1.49
   4   6  -5   22.07    1.39
   4   6  -5   24.36    1.47
   4   6  -5   23.08    1.42
   4  -6  -5   21.73    1.41
   4   6  -4    7.69    0.79
   4   6  -4    8.38    0.85
   4   6  -4    7.77    0.81
   4   6  -3    5.15    0.67
  -4   6   3    5.62    0.73
   4   6  -3    4.61    0.63
   4   6  -3    4.21    0.59
   4  -6  -3    5.43    0.66
   4  -6  -2   55.87    2.48
   4   6  -2   54.99    2.49
  -4   6   2   53.97    2.56
   4  -6  -2   50.14    2.42
   4   6  -2   46.06    2.37
  -4   6   1    5.35    0.70
   4  -6  -1    4.77    0.65
   4   6  -1    5.24    0.64
   4   6  -1    5.99    0.69
   4   6  -1    5.11    0.68
   4   6  -1    4.89    0.62
  -4   6   0   88.00    3.76
   4  -6   0   86.61    3.66
   4   6   0   91.88    3.72
   4   6   0   87.39    3.75
  -4  -6   0   90.75    3.74
   4   6   0   87.43    3.68
   4   6   1  272.99    9.30
  -4  -6  -1  271.69    9.40
   4   6   1  274.09    9.28
  -4   6  -2   19.99    1.44
   4   6   2   23.56    1.45
  -4   6  -2   25.32    1.54
  -4  -6  -2   22.75    1.48
  -4   6  -3    4.46    0.60
  -4  -6  -3    5.51    0.61
  -4   6  -4    7.47    0.58
  -4   7   6    3.22    0.42
   4  -7  -6    4.06    0.46
   4   7  -6    3.25    0.42
   4  -7  -5   32.71    1.68
   4   7  -5   30.48    1.66
   4  -7  -5   33.10    1.69
   4   7  -4   16.85    1.18
   4   7  -3    6.38    0.75
  -4   7   3    6.49    0.81
   4   7  -3    5.32    0.67
   4   7  -3    6.23    0.71
   4  -7  -2   75.42    3.19
   4   7  -2   75.03    3.22
  -4   7   2   68.57    3.25
  -4   7   1   71.74    3.25
   4  -7  -1   75.88    3.21
   4   7  -1   72.50    3.15
   4   7  -1   72.07    3.21
   4   7  -1   73.08    3.27
   4   7  -1   75.26    3.23
  -4   7   0    3.69    0.64
   4   7   0    3.90    0.58
   4  -7   0    2.80    0.56
   4   7   0    3.44    0.58
  -4   7  -1   15.57    1.23
   4  -7   1   14.92    1.14
   4   7   1   12.97    1.08
  -4  -7  -1   14.22    1.15
   4   7   1   16.72    1.17
  -4   7  -2    6.70    0.74
   4   7   2    6.93    0.70
  -4   7  -2    7.86    0.79
  -4  -7  -2    5.80    0.68
  -4   7  -2    5.84    0.71
   4   7   3   28.67    1.43
  -4   7  -3   30.20    1.52
  -4  -7  -3   28.93    1.45
  -4   7  -3   29.95    1.46
   4   8  -5   46.42    1.97
   4  -8  -5   41.43    1.92
  -4   8   4    0.11    0.26
   4   8  -4   -0.05    0.24
   4   8  -3    2.75    0.49
  -4   8   3    3.71    0.62
   4  -8  -2  106.12    4.22
   4   8  -2  110.63    4.25
  -4   8   2   97.39    4.21
  -4   8   1   16.81    1.29
   4  -8  -1   18.22    1.32
   4   8  -1   18.78    1.25
   4   8  -1   16.57    1.23
  -4   8   0    1.54    0.45
   4   8   0    1.46    0.39
   4  -8   0    1.39    0.38
   4   8   0    1.47    0.41
  -4   8  -1    6.81    0.77
   4  -8   1    8.88    0.80
   4   8   1    8.46    0.81
  -4  -8  -1    6.73    0.74
  -4   8  -1    8.33    0.80
   4   8   1    7.52    0.74
  -4   8  -2   23.07    1.29
   4  -8   2   23.67    1.27
   4   8   2   21.68    1.24
  -4   8  -2   22.28    1.28
  -4  -8  -2   20.34    1.25
  -4   8  -2   22.92    1.29
   4   8   2   21.54    1.20
   4   9  -5    1.32    0.24
  -4   9   4   18.07    1.09
   4   9  -4   16.40    1.00
   4  -9  -3   40.41    1.95
   4   9  -3   40.32    1.93
  -4   9   3   42.04    2.03
   4  -9  -2   21.53    1.36
   4   9  -2   24.15    1.38
  -4   9   2   22.28    1.39
   4  -9  -1   14.97    1.10
   4   9  -1   15.57    1.05
  -4   9   1   14.20    1.09
   4   9  -1   15.49    1.14
  -4   9   0   54.45    2.47
   4  -9   0   52.63    2.42
  -4   9   0   55.09    2.50
   4   9   0   52.72    2.38
  -4   9  -1    0.64    0.27
   4   9   1    0.96    0.27
   4   9   1    1.30    0.29
  -4   9  -1    1.02    0.32
  -4  -9  -1    0.85    0.25
   4   9   2    0.08    0.15
   4  -9   2    0.03    0.16
   4   9   2    0.06    0.14
  -4  -9  -2    0.16    0.17
  -4   9  -2   -0.12    0.17
   4 -10  -3   43.37    1.89
   4  10  -3   44.98    1.88
  -4  10   3   47.07    1.96
   4 -10  -2   11.85    0.84
   4  10  -2   14.11    0.87
  -4  10   2   11.55    0.83
   4 -10  -1   29.16    1.44
  -4  10   1   26.82    1.43
   4 -10   0    2.39    0.36
  -4  10   0    2.29    0.38
   5   0  -8   13.95    0.82
   5   0  -8   14.13    0.82
   5   0  -8   11.93    0.77
   5   0  -7    0.05    0.29
   5   0  -7    0.05    0.24
   5   0  -6  539.61   18.42
   5   0  -6  555.89   18.44
   5   0  -6  550.53   18.47
   5   0  -6  591.19   18.53
   5   0  -5   -0.06    0.28
   5   0  -5    0.06    0.31
   5   0  -5    0.06    0.28
   5   0  -4   43.95    2.59
   5   0  -4   46.69    2.15
   5   0  -3    0.09    0.23
   5   0  -2   22.73    1.67
   5   0  -1   -0.10    0.26
   5   0  -1    0.17    0.28
  -5   0   1   -0.09    0.27
   5   0   0  366.45   12.07
  -5   0   0  352.19   12.10
  -5   0   0  358.73   12.13
   5   0   1    0.06    0.23
  -5   0  -1    0.06    0.28
  -5   0  -1   -0.06    0.25
  -5   0  -1    0.06    0.23
  -5   0  -2  172.52    6.29
  -5   0  -2  166.32    6.31
  -5   0  -3    0.23    0.26
  -5   0  -4    7.42    0.64
  -5   0  -4    8.59    0.68
   5   0   4    7.98    0.69
   5   1  -8    4.88    0.46
   5   1  -8    4.64    0.45
   5  -1  -8    4.55    0.43
   5   1  -7    1.93    0.44
   5   1  -7    1.46    0.37
   5  -1  -7    0.94    0.33
   5   1  -6   98.72    4.07
   5  -1  -6   95.45    4.01
   5   1  -6   99.74    4.04
   5   1  -6   98.94    4.06
   5  -1  -6  106.46    4.12
   5  -1  -6  101.27    4.06
   5   1  -6   98.83    4.05
   5   1  -5   13.45    1.06
   5  -1  -5   13.21    1.04
   5   1  -5   12.93    1.04
   5  -1  -5   13.17    1.07
   5  -1  -5   12.85    1.04
   5   1  -5   11.29    0.99
   5   1  -4   19.21    1.58
   5   1  -4   21.49    1.24
   5  -1  -4   16.52    1.47
   5   1  -4   17.90    1.52
   5   1  -4   17.24    1.15
  -5   1   3   60.30    3.23
   5   1  -3   62.73    3.05
   5   1  -3   59.96    3.05
   5  -1  -3   64.68    3.12
   5   1  -2  240.66    8.76
   5  -1  -2  247.23    8.65
   5   1  -2  224.10    8.51
   5  -1  -2  223.33    8.53
  -5  -1   1   53.23    2.97
   5  -1  -1   58.12    3.06
   5   1  -1   62.23    3.19
   5  -1  -1   61.93    3.06
   5  -1   0    2.29    0.42
   5   1   0    1.34    0.47
   5  -1   0    1.09    0.43
  -5  -1   0    1.76    0.55
  -5   1   0    1.20    0.37
  -5  -1   0    2.39    0.45
  -5   1   0    2.55    0.45
  -5  -1   0    2.25    0.42
   5  -1   0    1.91    0.41
  -5   1  -1  154.48    6.00
  -5   1  -1  166.89    6.08
  -5  -1  -1  163.62    6.03
  -5   1  -1  168.13    6.15
  -5  -1  -1  172.37    6.16
  -5   1  -1  163.08    6.15
  -5  -1  -1  165.32    6.17
  -5   1  -2  141.14    5.30
  -5   1  -2  138.39    5.27
  -5  -1  -2  137.73    5.31
  -5   1  -3    3.30    0.53
  -5  -1  -3    4.23    0.58
   5  -1   3    3.24    0.58
  -5   1  -4   21.93    1.18
  -5  -1  -4   22.26    1.18
  -5   1  -4   21.94    1.18
  -5  -1  -4   21.19    1.17
   5  -1   4   22.86    1.23
   5   1   4   22.06    1.21
   5   2  -7    3.11    0.51
   5   2  -7    2.64    0.49
   5   2  -7    3.42    0.49
   5  -2  -7    3.08    0.47
   5   2  -6   13.72    1.10
   5  -2  -6   14.20    1.12
   5   2  -6   12.28    1.05
   5  -2  -6   12.62    1.04
   5  -2  -6   12.94    1.04
   5   2  -6   12.65    1.04
   5   2  -5   99.92    4.10
   5  -2  -5  107.68    4.16
   5   2  -5  100.70    4.11
   5   2  -5  100.86    4.09
   5  -2  -5  103.55    4.14
   5   2  -5  105.33    4.13
   5  -2  -4    5.46    0.63
   5   2  -4    5.67    0.64
   5   2  -4    5.44    0.84
   5   2  -3   17.98    1.14
   5   2  -3   14.90    1.35
   5   2  -3   20.17    1.17
  -5   2   3   17.82    1.61
   5  -2  -3   16.64    1.10
   5   2  -3   17.64    1.56
   5   2  -3   15.37    1.35
  -5   2   2    9.92    1.18
   5   2  -2   11.04    1.20
   5  -2  -2   11.78    1.17
   5   2  -2   10.55    1.05
  -5  -2   1   25.41    1.90
   5   2  -1   28.75    2.03
   5  -2  -1   32.36    2.03
  -5   2   0  168.66    6.26
  -5  -2   0  181.03    7.18
   5   2   0  179.93    7.16
  -5   2   0  171.61    6.27
   5  -2   0  162.77    6.85
  -5  -2   0  182.32    6.39
  -5   2   0  170.24    6.36
  -5  -2   0  165.08    6.32
   5  -2   0  162.75    6.28
  -5   2  -1   13.47    1.08
  -5   2  -1   14.22    1.11
  -5  -2  -1   13.96    1.11
  -5   2  -1   14.50    1.15
  -5  -2  -1   16.61    1.22
   5  -2   1   14.67    1.15
  -5   2  -2   21.19    1.40
  -5  -2  -2   21.06    1.41
   5  -2   2   21.27    1.44
  -5   2  -3    9.14    0.83
  -5   2  -3    7.53    0.76
   5  -2   3    9.01    0.86
  -5   2  -4   11.60    0.75
  -5   2  -4   10.32    0.73
   5  -2   4   11.66    0.78
   5   3  -7    0.96    0.32
   5  -3  -7    0.76    0.31
   5   3  -7    0.76    0.30
   5   3  -7    0.63    0.31
   5   3  -7    1.05    0.30
   5  -3  -7    0.42    0.24
   5   3  -7   -0.32    0.36
   5   3  -6    8.30    0.84
   5  -3  -6    6.83    0.80
   5   3  -6    9.44    0.91
   5  -3  -5   74.63    3.24
   5   3  -5   76.01    3.24
   5  -3  -5   73.68    3.22
   5   3  -4    4.51    0.61
   5  -3  -4    4.14    0.59
   5   3  -4    5.17    0.64
   5   3  -4    5.18    0.63
   5   3  -3   19.04    1.22
   5   3  -3   17.05    1.16
  -5   3   3   22.96    1.38
  -5   3   3   17.88    1.71
   5  -3  -3   16.64    1.16
   5   3  -3   19.76    1.60
   5   3  -3   17.55    1.62
   5   3  -3   19.44    1.21
   5  -3  -3   19.01    1.61
   5  -3  -3   19.36    1.21
   5   3  -2    1.85    0.41
   5   3  -2    1.79    0.38
  -5   3   2    2.50    0.63
   5  -3  -2    1.95    0.39
  -5   3   2    2.49    0.47
   5   3  -2    2.69    0.64
   5  -3  -2    2.43    0.58
  -5   3   1  105.67    5.11
  -5  -3   1  114.78    5.12
   5   3  -1  121.55    5.24
   5  -3  -1  119.90    5.09
   5  -3  -1  113.71    4.45
   5   3   0   65.89    3.50
  -5  -3   0   54.00    3.29
  -5   3   0   55.86    2.64
  -5  -3   0   63.31    2.81
   5  -3   0   58.46    2.75
  -5   3  -1   53.71    2.57
  -5   3  -1   51.52    2.54
  -5  -3  -1   57.39    2.65
  -5  -3  -1   54.67    2.65
   5  -3   1   57.80    2.66
   5   3   2   -0.30    1.50
  -5   3  -2    0.26    0.28
  -5  -3  -2    0.62    0.34
   5  -3   2    0.14    0.31
   5   3   3    1.98    1.40
  -5   3  -3    3.74    0.52
   5  -3   3    2.95    0.48
  -5   3  -4   18.62    0.96
  -5   3  -4   18.34    0.91
   5  -4  -7   15.38    0.98
   5   4  -7   14.84    0.96
   5   4  -7   14.49    0.94
   5  -4  -7   13.02    0.91
   5  -4  -7   14.69    0.92
   5   4  -6    0.06    0.28
   5  -4  -6    0.29    0.30
   5   4  -6   -0.06    0.28
   5   4  -6    0.17    0.26
   5  -4  -5    3.41    0.61
   5   4  -5    4.50    0.65
   5   4  -4   66.17    2.93
   5   4  -4   64.44    2.94
   5   4  -4   68.38    2.93
   5  -4  -4   67.86    2.97
   5   4  -3  116.28    4.42
   5   4  -3  107.50    4.34
  -5   4   3  117.15    4.51
   5   4  -3  110.98    4.36
   5  -4  -3  112.16    4.40
   5  -4  -2   34.47    1.76
   5   4  -2   32.01    1.72
   5   4  -2   33.55    1.73
  -5   4   2   32.96    1.82
  -5   4   2   30.81    2.33
   5  -4  -2   30.08    1.71
   5  -4  -1   39.51    2.06
  -5  -4   1   47.84    2.88
   5   4  -1   45.06    2.13
  -5   4   0  127.91    5.12
  -5  -4   0  135.91    5.18
   5  -4   0  124.79    5.09
  -5  -4  -1  131.91    5.20
   5  -4   1  127.88    5.13
  -5   4  -2    9.16    0.93
  -5  -4  -2    9.69    0.93
   5  -4   2   10.06    0.93
  -5   4  -3    2.17    0.43
   5   4   3   -0.22    1.13
  -5   5   7    8.30    0.69
   5  -5  -7   11.50    0.75
   5  -5  -7   10.50    0.73
   5   5  -7   10.94    0.72
   5  -5  -7   10.47    0.71
   5  -5  -6    8.24    0.77
   5   5  -6    7.76    0.75
   5   5  -6    7.12    0.72
   5  -5  -5    0.81    0.37
   5   5  -5    1.24    0.40
   5   5  -4    1.81    0.46
   5   5  -4    1.77    0.42
   5   5  -4    1.86    0.44
   5  -5  -4    2.07    0.48
   5   5  -3   64.77    2.81
  -5   5   3   58.65    2.83
   5   5  -3   58.39    2.69
   5   5  -3   58.47    2.72
   5  -5  -3   59.37    2.75
   5  -5  -2    1.59    0.42
   5   5  -2    1.49    0.42
   5   5  -2    1.03    0.34
  -5   5   2    1.34    0.43
   5  -5  -2    0.93    0.36
   5  -5  -1  131.31    5.22
   5   5  -1  140.32    5.27
   5   5  -1  143.13    5.30
  -5   5   0    7.62    0.86
   5  -5   0    7.53    0.81
  -5  -5   0    9.18    0.90
  -5   5  -1   24.84    1.63
  -5  -5  -1   25.69    1.60
  -5   5  -2   25.13    1.51
  -5   5  -2   23.56    1.43
  -5  -5  -2   22.72    1.41
  -5   5  -3   57.48    2.02
  -5   5  -3   55.74    2.03
   5  -6  -6    4.76    0.55
   5   6  -6    4.94    0.55
   5   6  -6    5.36    0.57
   5  -6  -5   16.71    1.18
   5   6  -5   16.17    1.14
   5   6  -4   17.53    1.23
  -5   6   4   18.02    1.30
   5   6  -4   17.07    1.24
   5   6  -4   19.73    1.27
   5   6  -3    0.64    0.35
  -5   6   3    0.92    0.39
   5   6  -3    0.13    0.28
   5  -6  -3    0.85    0.35
   5  -6  -2   18.80    1.33
   5   6  -2   21.85    1.37
  -5   6   2   18.95    1.39
   5  -6  -2   16.51    1.25
   5  -6  -1   29.76    1.74
   5   6  -1   31.00    1.75
   5  -6  -1   29.04    1.72
   5   6  -1   30.87    1.76
  -5   6   0    1.20    0.43
   5   6   0    1.92    0.44
   5  -6   0    1.17    0.39
   5   6   0    1.76    0.42
  -5  -6   0    0.88    0.35
  -5   6  -1   78.56    3.43
   5  -6   1   82.07    3.36
  -5  -6  -1   73.88    3.34
  -5   6  -2    3.18    0.52
  -5   6  -2    2.93    0.48
  -5  -6  -2    3.46    0.52
   5   6   3   -0.03    0.14
   5  -6   3   -0.03    0.17
  -5   6  -3   -0.07    0.22
   5  -7  -6    0.03    0.16
   5  -7  -6    0.16    0.20
   5   7  -6    0.60    0.20
   5  -7  -5   21.28    1.26
   5   7  -5   19.30    1.19
   5   7  -5   20.87    1.22
   5   7  -4  134.12    5.29
  -5   7   4  148.82    5.47
   5   7  -4  145.12    5.36
   5   7  -4  148.49    5.32
   5   7  -3    0.12    0.26
  -5   7   3   -0.07    0.33
   5   7  -3    0.12    0.30
   5  -7  -3    0.12    0.29
   5   7  -2    1.34    0.39
  -5   7   2    1.09    0.41
   5  -7  -2    1.22    0.38
  -5   7   1   97.28    3.90
   5  -7  -1   85.07    3.75
   5   7  -1   94.71    3.84
  -5   7   0   34.80    1.95
   5  -7   0   37.33    1.94
   5   7   0   34.59    1.89
   5   7   0   37.72    1.92
  -5   7  -1    4.77    0.64
   5  -7   1    4.73    0.61
   5   7   1    5.01    0.60
  -5  -7  -1    4.98    0.62
  -5   7  -2    2.20    0.39
   5  -7   2    2.54    0.39
  -5  -7  -2    2.97    0.41
  -5   7  -2    2.18    0.37
   5  -8  -5   17.27    0.99
   5   8  -5   16.77    0.97
   5   8  -4   39.37    1.83
  -5   8   4   37.59    1.90
   5  -8  -4   39.24    1.87
   5   8  -3    1.69    0.41
  -5   8   3    1.67    0.44
   5   8  -3    1.26    0.33
   5   8  -2   65.74    2.82
  -5   8   2   61.79    2.86
   5   8  -2   68.49    2.84
  -5   8   1   16.81    1.21
   5  -8  -1   18.38    1.21
   5  -8  -1   17.78    1.20
  -5   8   0   90.50    3.77
   5  -8   0   96.64    3.73
   5   8   0   97.97    3.75
  -5   8  -1    1.08    0.33
   5   8   1    1.71    0.31
   5  -8   1    1.39    0.32
  -5  -8  -1    1.57    0.32
  -5   8  -1    1.26    0.31
   5   9  -4   11.27    0.72
  -5   9   4   10.96    0.76
   5  -9  -4   11.50    0.76
   5   9  -3    1.35    0.31
  -5   9   3    2.09    0.40
   5   9  -2   18.46    1.09
  -5   9   2   17.82    1.11
   5  -9  -1    3.40    0.47
  -5   9   1    3.67    0.50
   5   9  -1    4.71    0.50
   5  -9   0   13.24    0.87
  -5   9   0   13.08    0.90
   6   0  -7   -0.14    0.26
   6   0  -6  140.31    5.30
   6   0  -6  137.85    5.30
   6   0  -5    0.06    0.29
   6   0  -5    0.18    0.27
   6   0  -4    5.40    0.71
   6   0  -4    5.27    0.65
   6   0  -3    0.06    0.26
   6   0  -3   -0.06    0.28
   6   0  -3   -0.11    0.29
   6   0  -2  113.32    4.47
   6   0  -2  116.42    5.11
   6   0  -1   -0.06    0.24
  -6   0   1    0.06    0.25
   6   0   0    3.07    0.53
  -6   0   0    3.53    0.59
  -6   0   0    3.58    0.60
   6   0   1    0.13    0.25
  -6   0  -1    0.06    0.26
  -6   0  -1    0.21    0.27
  -6   0  -1   -0.22    0.33
   6   0   1   -0.26    0.32
  -6   0  -2   11.01    0.92
  -6   0  -2   10.22    0.93
   6   0   2   10.76    0.95
  -6   0  -3   -0.08    0.17
  -6   0  -3    0.20    0.21
   6   0   3   -0.13    0.17
   6   1  -7   17.89    1.13
   6  -1  -7   15.81    1.08
   6   1  -6   60.63    2.78
   6   1  -6   64.22    2.80
   6  -1  -6   59.39    2.78
   6  -1  -6   66.07    2.83
   6   1  -6   58.74    2.76
   6   1  -5   26.48    1.60
   6  -1  -5   29.37    1.68
   6  -1  -5   27.99    1.65
   6   1  -5   25.24    1.59
   6  -1  -4    2.90    0.52
   6   1  -4    2.78    0.53
   6  -1  -4    3.17    0.54
   6   1  -4    2.92    0.52
   6  -1  -3   13.27    1.03
   6   1  -3   13.57    1.05
   6  -1  -3   11.62    0.98
   6   1  -3   12.15    0.99
   6  -1  -2   91.63    3.62
   6   1  -2   86.74    3.59
   6   1  -2   85.25    4.17
   6  -1  -2   82.85    4.12
   6   1  -2   87.64    3.61
  -6   1   1    8.72    0.88
  -6  -1   1    9.22    0.91
  -6   1   1    9.42    0.91
   6  -1  -1   10.57    0.94
   6   1  -1    9.29    0.87
  -6   1   0   17.39    1.26
  -6   1   0   17.03    1.28
  -6  -1   0   16.74    1.27
  -6   1   0   18.66    1.34
  -6  -1   0   17.13    1.29
   6  -1   0   16.93    1.24
   6  -1   0   15.03    1.18
   6   1   0   16.16    1.21
  -6   1  -1  129.78    5.12
  -6   1  -1  136.09    5.21
  -6  -1  -1  135.02    5.14
  -6  -1  -1  129.22    5.21
  -6   1  -1  133.22    5.28
  -6  -1  -1  136.96    5.30
   6  -1   1  140.01    5.27
   6   1   1  135.42    5.21
  -6   1  -2    8.94    0.84
  -6  -1  -2    9.74    0.88
   6  -1   2   10.04    0.90
   6   1   2    8.77    0.82
  -6   1  -3   17.78    1.03
  -6   1  -3   15.33    0.98
   6  -1   3   19.38    1.11
   6   1   3   17.40    1.03
   6   2  -7   94.84    3.65
   6   2  -7   92.08    3.60
   6  -2  -7   96.49    3.65
   6   2  -6   11.26    0.98
   6  -2  -6   10.70    0.93
   6  -2  -6   11.59    0.98
   6  -2  -6    9.59    0.87
   6   2  -6   10.49    0.92
   6   2  -5    0.81    0.35
   6  -2  -5    0.70    0.36
   6   2  -4   30.84    1.72
   6  -2  -4   28.70    1.69
   6   2  -4   31.06    1.73
   6   2  -3    5.36    0.66
   6   2  -3    4.73    0.62
   6  -2  -3    4.27    0.60
   6   2  -2    1.05    0.37
   6   2  -2    0.50    0.31
  -6  -2   1   21.38    1.43
   6  -2  -1   21.58    1.44
   6   2  -1   23.68    1.45
   6   2   0  143.55    8.09
  -6   2   0  142.61    5.40
  -6  -2   0  141.18    5.47
  -6  -2   0  141.28    5.49
   6  -2   0  154.42    5.53
   6   2   0  127.50    5.31
   6   2   1   68.53    3.05
  -6   2  -1   69.11    3.04
  -6   2  -1   72.44    3.09
  -6  -2  -1   65.75    3.03
  -6  -2  -1   67.71    3.10
   6  -2   1   74.42    3.16
  -6   2  -2   36.28    1.81
  -6  -2  -2   33.18    1.79
   6  -2   2   39.44    1.91
   6   2   2   32.88    1.75
  -6   2  -3    4.47    0.51
   6  -2   3    5.08    0.52
   6   3  -7   30.09    1.46
   6  -3  -7   26.23    1.41
   6   3  -7   26.29    1.39
   6   3  -6    0.34    0.32
   6  -3  -6    0.11    0.30
   6   3  -6    0.45    0.29
   6  -3  -6    0.39    0.30
   6   3  -5    0.59    0.31
   6  -3  -5    0.44    0.30
   6   3  -4    2.23    0.48
   6   3  -3   96.86    3.94
   6   3  -3   95.30    3.90
  -6   3   3  102.04    4.09
   6  -3  -3   92.10    3.86
   6   3  -2   80.01    3.31
  -6   3   2   74.00    3.37
  -6  -3   1   88.67    3.66
   6  -3  -1   80.62    3.60
  -6   3   0   23.57    1.49
  -6  -3   0   22.56    1.53
  -6  -3   0   22.35    1.54
   6  -3   0   22.56    1.54
   6   3   0   27.60    1.60
   6   3   1   13.76    1.09
  -6  -3  -1   12.29    1.04
  -6  -3  -1   12.27    1.08
   6  -3   1   11.26    1.05
  -6   3  -2   39.77    2.05
  -6  -3  -2   46.09    2.10
   6  -3   2   44.09    2.09
   6   3   2   47.03    2.08
  -6   3  -3   18.45    1.04
  -6   3  -3   18.70    1.04
   6  -3   3   19.30    1.05
   6   3   3   20.54    1.04
   6   4  -7    7.36    0.61
   6  -4  -7    7.33    0.62
   6   4  -7    7.93    0.63
   6   4  -6    6.57    0.69
   6  -4  -6    6.54    0.70
   6   4  -6    5.75    0.67
   6  -4  -6    6.83    0.69
   6  -4  -5   39.98    2.05
   6   4  -5   41.84    2.05
   6  -4  -5   39.43    2.06
   6   4  -4   42.88    2.17
  -6   4   4   39.33    2.15
   6   4  -4   36.77    2.04
   6  -4  -4   43.86    2.15
   6   4  -3   31.42    1.76
   6   4  -3   32.49    1.79
  -6   4   3   32.81    1.88
   6   4  -3   28.90    1.70
   6  -4  -3   28.62    1.73
   6   4  -2   29.97    1.69
   6   4  -2   31.27    1.75
  -6   4   2   29.84    1.82
   6  -4  -2   28.81    1.72
  -6   4   0   77.38    3.36
  -6  -4   0   72.86    3.31
  -6  -4   0   73.41    3.32
   6  -4   0   75.95    3.37
   6   4   0   77.28    3.27
   6   4   1    4.84    0.64
  -6   4  -1    5.02    0.71
  -6  -4  -1    5.00    0.66
  -6  -4  -1    5.97    0.72
   6  -4   1    4.96    0.67
   6   4   2    0.05    0.21
  -6   4  -2    0.26    0.27
  -6  -4  -2   -0.10    0.21
   6  -4   2    0.34    0.27
   6   5  -6    0.04    0.23
   6  -5  -6   -0.18    0.27
   6   5  -6   -0.05    0.24
   6  -5  -5   75.52    3.17
   6   5  -5   73.81    3.09
   6  -5  -5   73.90    3.12
   6   5  -4    0.37    0.29
  -6   5   4    0.67    0.35
   6  -5  -4    0.71    0.35
   6   5  -4    0.43    0.32
   6  -5  -4    0.63    0.35
   6   5  -3    8.61    0.90
  -6   5   3   11.25    1.05
   6   5  -3   10.35    0.95
   6   5  -3   10.31    0.94
   6  -5  -3   12.01    1.02
   6  -5  -2    6.41    0.75
   6   5  -2    6.06    0.71
   6   5  -2    5.89    0.72
  -6   5   2    4.71    0.71
   6  -5  -2    5.83    0.72
   6  -5  -1   61.54    2.82
   6   5  -1   62.13    2.80
  -6   5   0   47.00    2.29
   6  -5   0   40.85    2.11
  -6  -5   0   42.87    2.23
  -6  -5   0   43.87    2.22
  -6   5  -1   68.21    2.92
  -6  -5  -1   62.31    2.81
  -6  -5  -1   67.08    2.90
   6   5   1   62.81    2.76
   6   5   2    0.43    0.22
  -6   5  -2    0.79    0.28
  -6  -5  -2    0.71    0.25
   6  -6  -6    0.11    0.20
   6   6  -6    0.29    0.21
   6  -6  -5    4.77    0.58
   6   6  -5    4.99    0.56
   6   6  -4   17.39    1.19
  -6   6   4   16.50    1.20
   6  -6  -4   14.44    1.10
   6   6  -4   14.59    1.11
   6   6  -3    6.15    0.72
  -6   6   3    7.72    0.85
   6   6  -3    5.90    0.71
   6   6  -3    5.66    0.71
   6  -6  -3    5.92    0.74
   6  -6  -2   32.62    1.84
   6   6  -2   32.80    1.79
  -6   6   2   36.45    1.94
   6   6  -2   32.44    1.79
   6  -6  -2   35.25    1.90
   6  -6  -1  242.81    8.39
   6   6  -1  231.57    8.27
   6  -6  -1  237.32    8.35
  -6   6   0    8.37    0.83
   6  -6   0    6.66    0.71
   6   6   0    7.11    0.72
  -6  -6   0    7.45    0.78
   6  -6   0    6.76    0.71
  -6   6  -1    1.53    0.38
   6  -6   1    1.11    0.31
  -6  -6  -1    1.23    0.31
  -6  -6  -1    1.58    0.34
  -6   6  -2   13.70    0.83
  -6  -6  -2   12.90    0.80
   6  -7  -5    2.10    0.36
   6   7  -5    1.80    0.34
   6   7  -4   17.20    1.11
  -6   7   4   16.74    1.16
   6  -7  -4   17.62    1.12
   6   7  -4   16.77    1.11
   6   7  -3   67.22    2.89
  -6   7   3   65.81    2.95
   6   7  -3   66.43    2.87
   6  -7  -3   69.78    2.93
   6   7  -2   19.52    1.25
  -6   7   2   22.39    1.38
   6   7  -2   21.53    1.31
   6  -7  -2   20.30    1.31
   6  -7  -1   22.32    1.37
  -6   7   0    0.89    0.31
   6  -7   0    0.47    0.28
  -6  -7   0    0.54    0.27
  -6   7  -1   27.16    1.36
   6  -7   1   26.68    1.31
  -6  -7  -1   26.42    1.31
  -6  -7  -1   27.74    1.35
  -6   7  -1   25.98    1.33
   6   8  -4   29.51    1.41
  -6   8   4   30.97    1.49
   6  -8  -4   28.13    1.40
   6   8  -3    9.48    0.75
  -6   8   3    8.34    0.75
   6   8  -3   10.70    0.78
   6   8  -2    2.97    0.44
   6   8  -1    1.12    0.30
  -6   8   0    2.58    0.38
   6  -8   0    2.84    0.38
  -6  -8   0    2.62    0.37
   7   0  -7   -0.04    0.20
   7   0  -6    8.48    0.80
   7   0  -6    8.91    0.84
   7   0  -5   -0.45    0.35
   7   0  -5   -0.18    0.31
   7   0  -4   -0.07    0.31
   7   0  -4   -0.13    0.34
   7   0  -3    0.20    0.32
   7   0  -3   -0.06    0.28
   7   0  -2   92.70    3.89
   7   0  -1    0.20    0.30
  -7   0   1   -0.21    0.30
  -7   0   0   60.03    2.77
  -7   0   0   61.76    2.87
   7   0   0   60.13    2.78
  -7   0  -1    0.10    0.24
  -7   0  -1   -0.06    0.23
   7   1  -7    2.12    0.37
   7  -1  -7    1.73    0.35
   7  -1  -6    2.61    0.46
   7   1  -6    1.63    0.40
   7  -1  -6    2.78    0.48
   7  -1  -5    5.69    0.71
   7   1  -5    5.31    0.69
   7   1  -5    7.56    0.77
   7  -1  -5    5.58    0.71
   7  -1  -5    7.77    0.81
   7  -1  -4   81.10    3.48
   7   1  -4   78.15    3.45
   7  -1  -4   77.68    3.39
   7   1  -4   79.66    3.41
   7  -1  -3   19.82    1.35
   7   1  -3   16.23    1.26
   7  -1  -3   15.99    1.20
   7   1  -3   18.13    1.27
   7  -1  -2   21.72    1.47
   7   1  -2   24.62    1.54
   7  -1  -1  135.87    5.23
   7   1  -1  138.57    5.26
  -7   1   1  134.36    5.22
  -7  -1   1  133.96    5.27
   7   1  -1  132.01    5.23
  -7   1   0  129.26    4.83
  -7  -1   0  122.21    4.77
  -7  -1   0  120.09    4.85
  -7  -1   0  118.45    4.84
   7   1   0  123.48    4.81
   7   1   1    1.70    0.38
  -7  -1  -1    1.13    0.36
  -7  -1  -1    0.87    0.34
   7  -1   1    1.67    0.38
  -7   1  -2   20.27    1.13
   7  -1   2   20.46    1.12
   7   2  -7    7.53    0.63
   7  -2  -7    7.42    0.62
   7   2  -6   12.23    0.96
   7  -2  -6   10.62    0.90
   7   2  -6   11.31    0.89
   7  -2  -5    3.48    0.56
   7   2  -5    3.59    0.58
   7   2  -5    4.90    0.63
   7  -2  -5    4.37    0.63
   7  -2  -4   20.36    1.38
   7   2  -4   21.09    1.39
   7   2  -3    6.92    0.77
   7  -2  -3    6.13    0.74
   7   2  -3    6.74    0.76
  -7   2   3    5.87    0.79
   7   2  -2  142.12    5.43
   7  -2  -1   35.16    1.86
   7   2  -1   36.05    1.89
  -7  -2   1   34.29    1.92
   7   2  -1   32.70    1.85
  -7   2   0   43.86    2.15
  -7  -2   0   40.99    2.08
  -7  -2   0   43.61    2.20
  -7  -2   0   40.37    2.15
   7  -2   0   43.52    2.18
   7   2   0   38.39    2.08
   7   2   1    2.39    0.42
  -7   2  -1    2.49    0.47
  -7  -2  -1    1.74    0.41
  -7  -2  -1    2.00    0.42
   7  -2   1    2.47    0.46
  -7   2  -2    6.57    0.57
  -7  -2  -2    6.47    0.56
   7  -2   2    7.02    0.59
   7   2   2    7.11    0.57
   7   3  -7   18.21    1.00
   7  -3  -7   18.92    1.00
   7   3  -6    0.19    0.30
   7  -3  -6   -0.15    0.24
   7   3  -5   25.12    1.48
   7  -3  -5   24.99    1.51
   7   3  -4    6.46    0.76
  -7   3   4    7.03    0.80
   7   3  -4    6.51    0.75
   7   3  -3   39.05    2.08
  -7   3   3   42.58    2.26
   7   3  -3   41.73    2.11
   7   3  -2    0.37    0.29
  -7   3   2    0.49    0.36
   7  -3  -2    0.44    0.31
   7   3  -1   22.40    1.42
  -7  -3   1   22.60    1.48
   7   3  -1   21.71    1.41
   7   3   0    1.47    0.38
  -7  -3   0    2.38    0.49
  -7  -3   0    2.11    0.45
   7   3   1    0.05    0.25
  -7   3  -1    0.10    0.26
  -7  -3  -1    0.19    0.23
  -7  -3  -1    0.05    0.23
   7  -3   1   -0.20    0.26
   7   4  -6   24.01    1.31
   7   4  -6   25.62    1.32
   7  -4  -6   22.54    1.28
   7   4  -5   18.92    1.20
   7  -4  -5   17.70    1.20
  -7   4   4    5.97    0.73
   7   4  -4    5.42    0.68
   7   4  -3    1.21    0.39
   7   4  -3    0.89    0.35
  -7   4   3    1.39    0.45
   7  -4  -3    2.15    0.45
   7   4  -2   85.73    3.62
  -7   4   2   87.58    3.70
   7  -4  -2   89.26    3.66
   7   4  -1   57.01    2.62
  -7  -4   1   59.52    2.72
  -7  -4   0    5.04    0.65
  -7  -4   0    6.28    0.68
   7   4   0    5.66    0.63
  -7   4  -1    4.87    0.55
  -7  -4  -1    3.47    0.46
  -7  -4  -1    3.66    0.47
   7   4   1    3.60    0.45
   7   5  -6    0.03    0.19
   7   5  -6    0.31    0.21
   7  -5  -6    0.36    0.20
   7   5  -5    6.16    0.60
   7  -5  -5    4.72    0.58
  -7   5   4    6.00    0.72
   7   5  -4    6.53    0.70
   7   5  -4    6.98    0.71
   7  -5  -4    6.18    0.68
  -7   5   3   78.68    3.33
   7   5  -3   76.17    3.22
   7  -5  -3   74.52    3.22
   7   5  -2    6.09    0.66
  -7   5   2    4.34    0.62
   7  -5  -2    4.50    0.62
   7   5  -1    1.99    0.43
  -7  -5   1    2.44    0.45
   7  -5  -1    2.28    0.48
   7   5   0    2.52    0.41
  -7  -5   0    3.01    0.47
   7  -5   0    2.48    0.42
  -7  -5   0    2.89    0.43
  -7   5  -1   22.71    1.19
   7   5   1   23.39    1.15
  -7  -5  -1   22.34    1.16
   7  -5   1   23.70    1.17
  -7  -5  -1   24.22    1.21
   7   6  -5   -0.07    0.21
   7   6  -5   -0.03    0.18
   7   6  -5    0.08    0.21
   7  -6  -5   -0.11    0.18
  -7   6   4   19.71    1.28
   7   6  -4   22.22    1.26
   7   6  -4   23.46    1.30
  -7   6   3   39.57    2.02
   7   6  -3   40.98    1.96
   7   6  -3   45.06    2.00
   7  -6  -3   40.42    1.99
  -7   6   2    7.00    0.72
   7   6  -2    7.84    0.72
   7   6  -2    7.66    0.71
   7  -6  -2    8.97    0.79
   7   6  -1   27.06    1.40
  -7  -6   1   26.91    1.45
   7  -6  -1   25.36    1.40
   7   6   0    7.27    0.59
  -7  -6   0    6.91    0.61
   7  -6   0    6.83    0.59
  -7   7   4    2.40    0.38
   7   7  -4    2.87    0.37
   7  -7  -4    2.07    0.34
  -7   7   3   55.20    2.40
   7  -7  -3   54.47    2.35
   7   7  -2    5.43    0.54
   7  -7  -2    5.06    0.53
   7   7  -1    5.89    0.51
  -7  -7   1    5.20    0.51
   7  -7  -1    4.63    0.47
   8   0  -6    0.13    0.19
   8   0  -5    0.05    0.28
   8   0  -5   -0.21    0.29
   8   0  -4   27.77    1.59
   8   0  -3   -0.06    0.29
   8   0  -2   21.97    1.41
  -8   0   2   22.05    1.39
   8   0  -1   -0.11    0.27
  -8   0   1   -0.05    0.23
   8   0   0    5.60    0.60
  -8   0   0    5.75    0.60
   8  -1  -6   11.91    0.82
   8  -1  -6   11.04    0.83
   8   1  -6   12.53    0.86
   8   1  -5    9.60    0.82
   8  -1  -5    7.01    0.73
   8   1  -5    9.44    0.81
  -8   1   4   39.82    2.02
   8  -1  -4   38.08    1.96
   8   1  -4   37.97    1.95
   8  -1  -3    9.22    0.89
   8   1  -3    8.37    0.85
  -8   1   3    9.44    0.90
   8  -1  -2   19.37    1.32
   8   1  -2   21.83    1.39
   8  -1  -1   63.41    2.79
   8   1  -1   64.67    2.81
  -8   1   1   66.84    2.81
  -8  -1   1   65.79    2.82
   8  -1   0    1.64    0.34
   8   1   0    2.07    0.38
  -8   1   0    1.73    0.36
  -8  -1   0    1.97    0.37
   8   2  -6    0.76    0.25
   8  -2  -6    0.97    0.28
   8   2  -5    3.40    0.49
   8   2  -5    2.93    0.47
   8  -2  -5    3.55    0.51
   8   2  -4    4.00    0.57
  -8   2   4    3.42    0.55
   8   2  -3    0.06    0.28
  -8   2   3   -0.13    0.29
   8   2  -2   61.45    2.61
  -8   2   2   53.03    2.56
   8   2  -1   10.93    0.87
  -8   2   1    9.29    0.81
  -8  -2   1   10.03    0.85
  -8  -2   1   11.29    0.90
  -8  -2   0   33.10    1.59
  -8  -2   0   32.96    1.65
   8   3  -6    2.10    0.34
   8  -3  -6    2.08    0.34
   8   3  -5   22.17    1.26
   8   3  -5   23.05    1.28
   8  -3  -5   22.58    1.28
  -8   3   4   15.76    1.16
   8   3  -4   17.65    1.15
   8  -3  -4   18.34    1.15
   8   3  -3   69.21    2.95
  -8   3   3   74.19    3.12
   8   3  -2   31.54    1.59
  -8   3   2   27.57    1.60
   8   3  -1   14.64    0.98
  -8  -3   1   16.84    1.05
  -8  -3   1   16.05    1.07
   8  -3  -1   14.49    1.00
   8  -3   0   19.55    1.06
  -8  -3   0   19.79    1.10
   8   4  -5   26.55    1.32
   8   4  -5   24.12    1.28
   8  -4  -5   23.74    1.28
  -8   4   4   23.20    1.36
   8   4  -4   22.53    1.28
   8  -4  -4   22.37    1.28
   8   4  -3   73.97    2.90
  -8   4   3   64.49    2.90
   8   4  -2   32.79    1.57
   8  -4  -2   30.39    1.56
   8   4  -1   15.55    0.95
  -8  -4   1   14.05    0.94
   8  -4  -1   15.27    0.96
  -8  -4   0    0.75    0.22
   8  -4   0    0.89    0.22
   8   5  -5   19.18    0.99
   8   5  -5   16.15    0.92
   8  -5  -5   16.51    0.95
  -8   5   4    3.79    0.48
   8   5  -4    3.81    0.44
   8  -5  -4    3.77    0.47
   8   5  -3    0.52    0.24
  -8   5   3    0.18    0.25
   8  -5  -3    0.24    0.23
   8   5  -2   11.71    0.81
   8  -5  -2   11.96    0.84
   8   5  -1   44.29    1.81
  -8  -5   1   40.49    1.80
   8  -5  -1   43.33    1.82
  -8   6   3   82.67    3.23
   8  -6  -3   93.15    3.26
   8   6  -2    0.03    0.15
   8  -6  -2    0.30    0.18
   9   0  -5   -0.10    0.17
  -9   0   4    2.07    0.37
   9   0  -3    0.12    0.22
  -9   0   3   -0.17    0.23
   9   0  -2    3.19    0.43
  -9   0   2    4.03    0.46
  -9   0   2    3.70    0.43
   9  -1  -5    3.40    0.41
   9   1  -5    3.92    0.43
  -9   1   4   15.12    0.97
   9   1  -4   16.68    0.96
   9   1  -3   84.77    3.22
  -9   1   3   81.45    3.23
   9  -1  -2   41.64    1.82
   9   1  -2   42.68    1.82
  -9   1   2   39.25    1.79
  -9  -1   2   41.62    1.81
   9   2  -5    0.65    0.21
  -9   2   4   41.78    1.87
   9   2  -4   43.04    1.82
  -9   2   3   14.89    0.97
  -9  -2   3   17.64    1.00
  -9  -2   2   47.90    1.99
  -9   3   4   18.89    1.02
   9   3  -4   17.89    0.95
  -9   3   3    1.35    0.28
   0   0   0    0.00    0.00


TITL 5-VT in P2(1)/c
REM P2(1)/c (#14 in standard setting)
CELL 1.54184   7.786131   9.672231   6.743480  90.0000 115.2635  90.0000
ZERR    7.00   0.000325   0.000299   0.000285   0.0000   0.0051   0.0000
LATT  1
SYMM -x, y+1/2,-z+1/2
SFAC C H N
UNIT 21.00 28.00 28.00
REM  CrysAlisPro recorded range (K): Min=100.4; max=101.0; aver:100.7
TEMP -172
TREF
HKLF 4
END
_computing_structure_solution     'SHELXT 2018/2 (Sheldrick, 2018)'
;
_shelx_hkl_checksum                88376
_olex2_submission_special_instructions  'No special instructions were received'
_oxdiff_exptl_absorpt_empirical_details
;
Empirical correction (ABSPACK) includes:
- Absorption correction using spherical harmonics
- Frame scaling
;
_oxdiff_exptl_absorpt_empirical_full_max  4.260
_oxdiff_exptl_absorpt_empirical_full_min  0.830
